# Supplementary material for: Antarctic blackfin icefish genome reveals adaptations to extreme environments
Source: PubMed Central journal article supplement (PMC7307600; doi:10.1038/s41559-019-0812-7), 2019-02-25
Supplement: NIHMS1585566-supplement-Kim_Icefish_genome_supplementary_material.pdf [file NIHMS1585566-supplement-Kim_Icefish_genome_supplementary_material.pdf]

In the format provided by the authors and unedited.

# Antarctic blackfin icefish genome reveals adaptations to extreme environments

Bo-Mi Kim<sup>1</sup>, Angel Amores<sup>2</sup>, Seunghyun Kang<sup>1</sup>, Do-Hwan Ahn<sup>1</sup>, Jin-Hyoung Kim<sup>1</sup>, Il-Chan Kim<sup>3</sup>, Jun Hyuck Lee<sup>1,4</sup>, Sung Gu Lee<sup>1,4</sup>, Hyoungseok Lee<sup>1,4</sup>, Jungeun Lee<sup>1,4</sup>, Han-Woo Kim<sup>1,4</sup>, Thomas Desvignes<sup>5</sup>, Peter Batzel<sup>2</sup>, Jason Sydes<sup>2</sup>, Tom Titus<sup>2</sup>, Catherine A. Wilson<sup>2</sup>, Julian M. Catchen<sup>5</sup>, Wesley C. Warren<sup>6</sup>, Manfred Schartl<sup>7,8,9\*</sup>, H. William Detrich III<sup>10\*</sup>, John H. Postlethwait<sup>2\*</sup> and Hyun Park<sup>1,4\*</sup>

<sup>1</sup>Unit of Polar Genomics, Korea Polar Research Institute, Incheon, Korea. <sup>2</sup>Institute of Neuroscience, University of Oregon, Eugene, OR, USA. <sup>3</sup>Department of Polar Life Science, Korea Polar Research Institute, Incheon, Korea. <sup>4</sup>Polar Science, University of Science and Technology, Daejeon, Korea. <sup>5</sup>Department of Animal Biology, University of Illinois, Champaign, IL, USA. <sup>6</sup>McDonnell Genome Institute, Washington University, St. Louis, MO, USA. <sup>7</sup>Department of Developmental Biochemistry, Biocenter, University of Wuerzburg, Wuerzburg, Germany. <sup>8</sup>Hagler Institute for Advanced Study, Texas A&M University, College Station, TX, USA. <sup>9</sup>Department of Biology, Texas A&M University, College Station, TX, USA. <sup>10</sup>Department of Marine and Environmental Sciences, Northeastern University Marine Science Center, Nahant, MA, USA. \*e-mail: [phch1@biozentrum.uni-wuerzburg.de](mailto:phch1@biozentrum.uni-wuerzburg.de); [w.detrich@northeastern.edu](mailto:w.detrich@northeastern.edu); [jpostle@uoneuro.uoregon.edu](mailto:jpostle@uoneuro.uoregon.edu); [hpark@kopri.re.kr](mailto:hpark@kopri.re.kr)

## **Antarctic blackfin icefish genome reveals adaptations to extreme environments**

Bo-Mi Kim<sup>1</sup>, Angel Amores<sup>2</sup>, Seunghyun Kang<sup>1</sup>, Do-Hwan Ahn<sup>1</sup>, Jin-Hyoung Kim<sup>1</sup>, Il-Chan Kim<sup>3</sup>, Jun Hyuck Lee<sup>1,4</sup>, Sung Gu Lee<sup>1,4</sup>, Hyoungseok Lee<sup>1,4</sup>, Jungeun Lee<sup>1,4</sup>, Han-Woo Kim<sup>1,4</sup>, Thomas Desvignes<sup>2</sup>, Peter Batzel<sup>2</sup>, Jason Sydes<sup>2</sup>, Tom Titus<sup>2</sup>, Catherine Wilson<sup>2</sup>, Julian M. Catchen<sup>5</sup>, Wesley C Warren<sup>6</sup>, Manfred Schartl<sup>7,8,\*</sup>, H. William Detrich III<sup>9,\*</sup>, John H. Postlethwait<sup>2,\*</sup>, Hyun Park<sup>1,4,\*</sup>

## S1 Transposable element annotation

The icefish genome contains 50.36% repeat sequences including 47.41% TE elements such as LTR (5.58%), SINEs (0.58%), LINEs (7.25%) and DNA transposons (15.07%) (Supplementary Figure 15 and Supplementary Table 7). The size of the icefish genome is the largest reported to date for Antarctic notothenioid fishes. As the relative TE contribution impacts genome size, the relative contribution of major types of TEs, that is, LTR, LINE, and SINE retrotransposons as well as DNA transposons, was estimated in several fish genomes. According to their TE composition, most genomes showed a predominance of DNA transposons except tetraodon and takifugu. Some TE superfamilies, including gypsy, DIRs, L2, Rex retrotransposon, as well as Harbinger, hAT, P, PIF, PiggyBac and Heliton DNA transposons were detected in the majority of *C. aceratus*, but DRE, R1, R2 retrotransposon and IS3EU DNA transposon were not detected in the icefish genome (Supplementary Figure 16). Kimura distances (K-values) were calculated for all TE copies of each element in order to estimate the “relative age” and transposition history of TEs<sup>1</sup>. Copy divergence is correlated with the age of activity: Very similar copies (low K-values) are indicative of rather recent activity (on the left part of the graph), while divergent copies (high K-values) have been generated by more ancient transposition events (on the right part of the graph). Results were grouped for the four different types of TEs (DNA transposons, LTR, LINE, and SINE retrotransposons) (Supplementary Figure 17). Teleost genomes generally contain fewer ancient copies (K-values >25), and significant interspecific differences in profiles were observed with generally one or two general bursts of transposition. Antarctic fishes and stickleback genome are dominated by rather recent copies (K-values <5) and strongly shaped by DNA transposons, which can be taken as indication of recent bursts of transposition in Antarctic fishes. TE expansion may have facilitated gene duplication and other events of genome evolution in particular periods of evolutionary history and thus may have contributed to adaptation to the specifics of Antarctic environments.

## **S2 Expansion of Olfactory receptors**

Olfactory receptor (*or*) genes were annotated by manual inspection from the blackfin icefish genome. In total, 212 *or* genes were annotated and classified into 11 subclasses based on phylogenetic distance. Of the 212, 161 genes ( $\approx 76\%$ ) were classified into the 'delta' class, which is known to detect water-soluble odorants<sup>2</sup>. When the total number of blackfin icefish *or* genes was compared to those of five teleosts that were previously annotated<sup>2</sup>, we found that blackfin icefish has the largest number of *or* genes among these fish (Supplementary Table 21). In addition, sensory system related GO terms such as *sensory perception of chemical stimulus* (GO:0007606) and *sensory perception* (GO:0007600) in the biological process category and *olfactory receptor activity* (GO:0004984) in the molecular function category were enriched in the expanded *or* gene dataset of the blackfin icefish genome (Supplementary Table 10).



**Supplementary Fig. 1. Photograph of a female specimen of the Antarctic blackfin icefish, *Chaenocephalus aceratus*.**

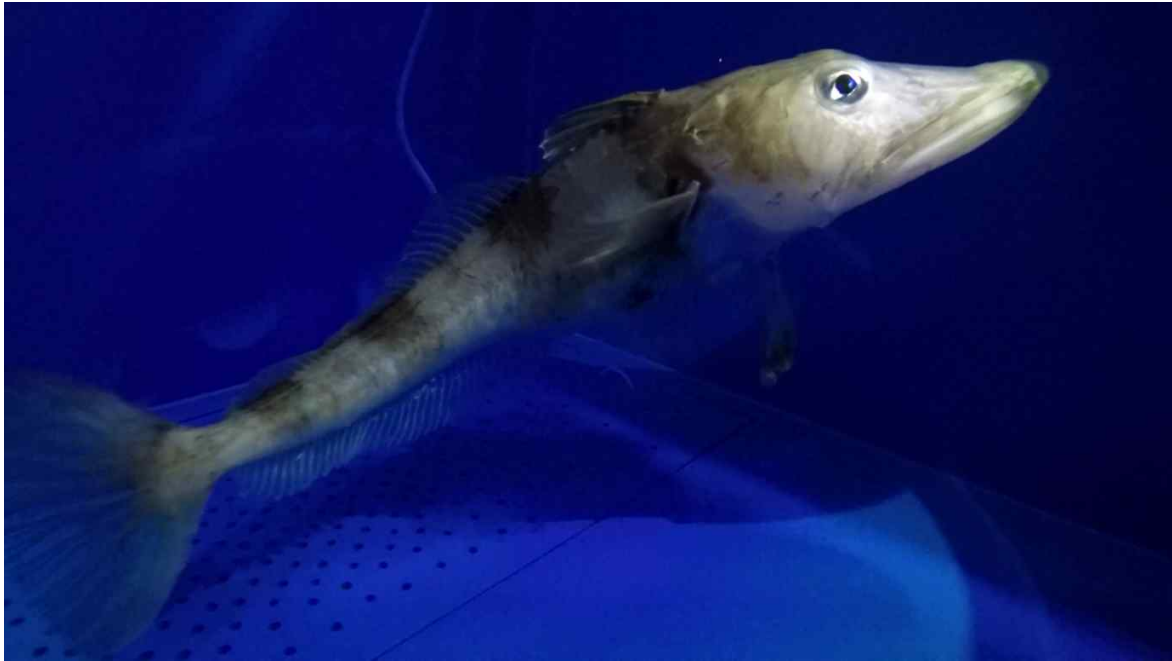

**Supplementary Fig. 2. Sampling sites for Antarctic blackfin icefish.** The red dot shows the sampling location for the specimen used in genome and transcriptome sequencing, and the red triangle represents the sampling site for fish used to make the genetic linkage map and for the microRNA-seq experiments. Map was based on the updated Figure 1 of Park et al. (2010)<sup>3</sup>.

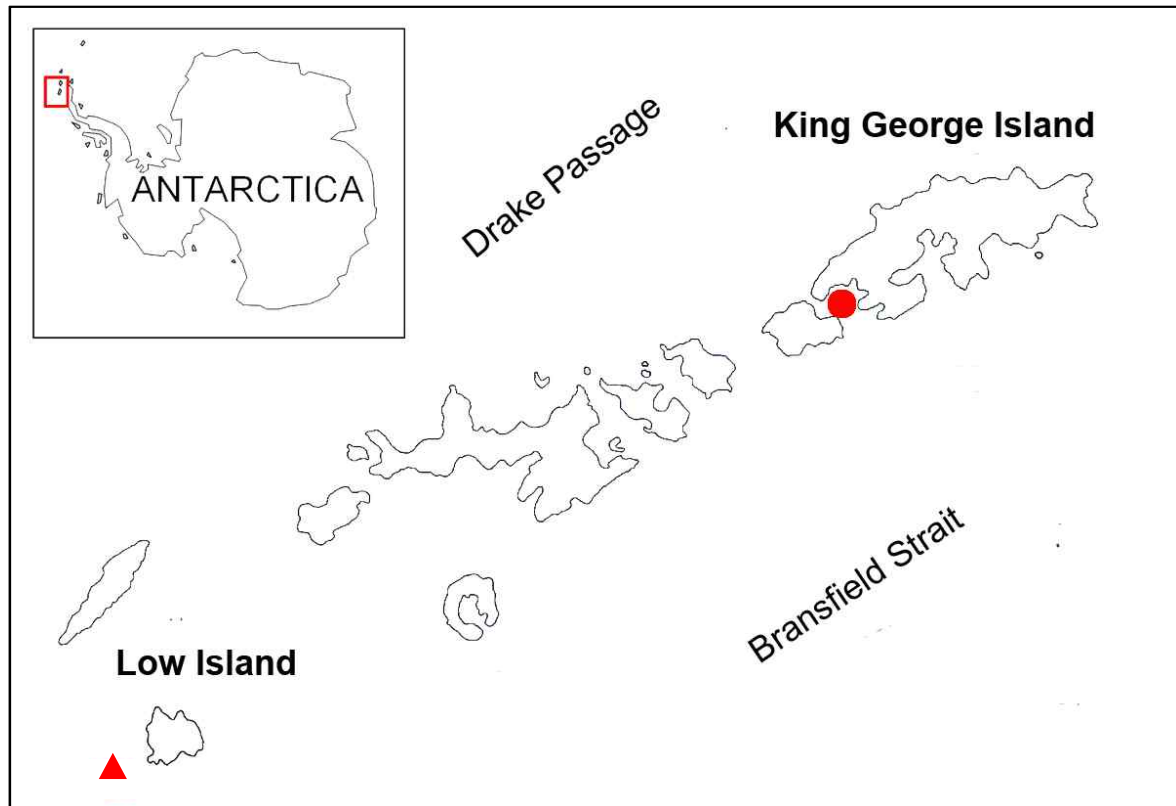

**Supplementary Fig. 3. Estimation of genome size by K-mer analysis.** Genome size was calculated as total error-corrected PacBio sequence. The estimated genome size of *C. aceratus* is 1.1 Gb (81-mers).

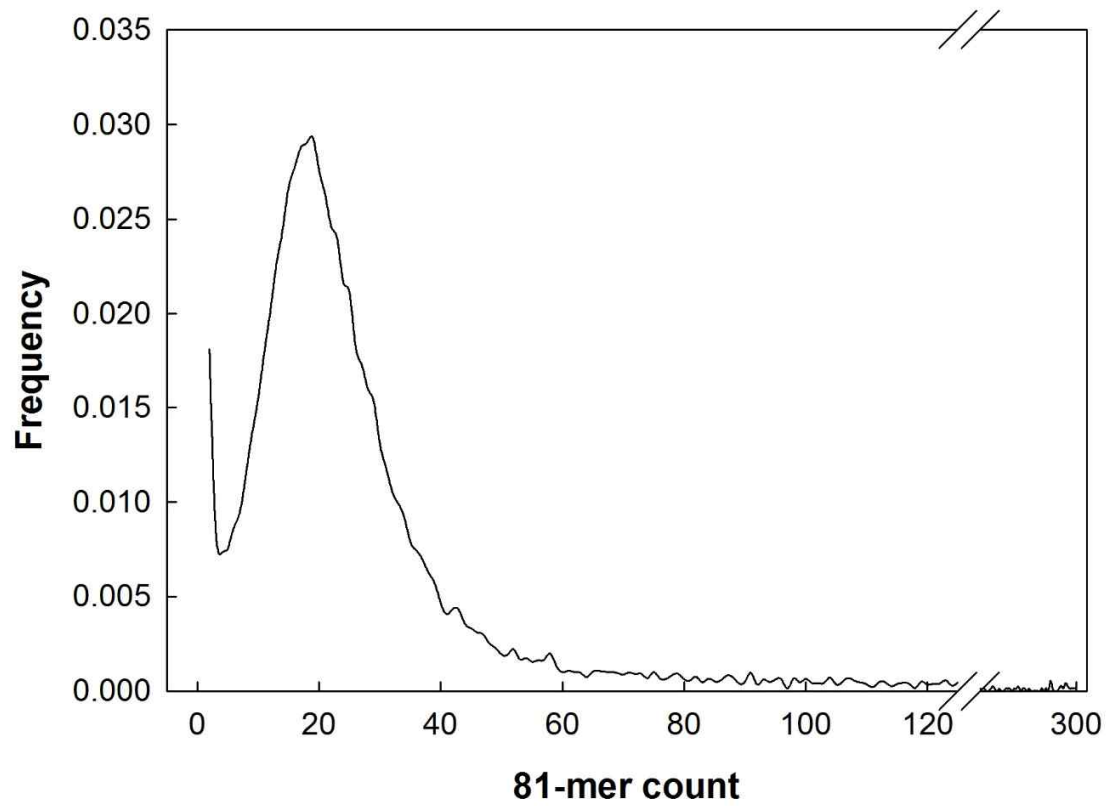

**Supplementary Fig. 4. Genetic linkage map for the blackfin icefish.**

Supplementary Fig. 4. Genetic linkage map for the blackfin icefish.

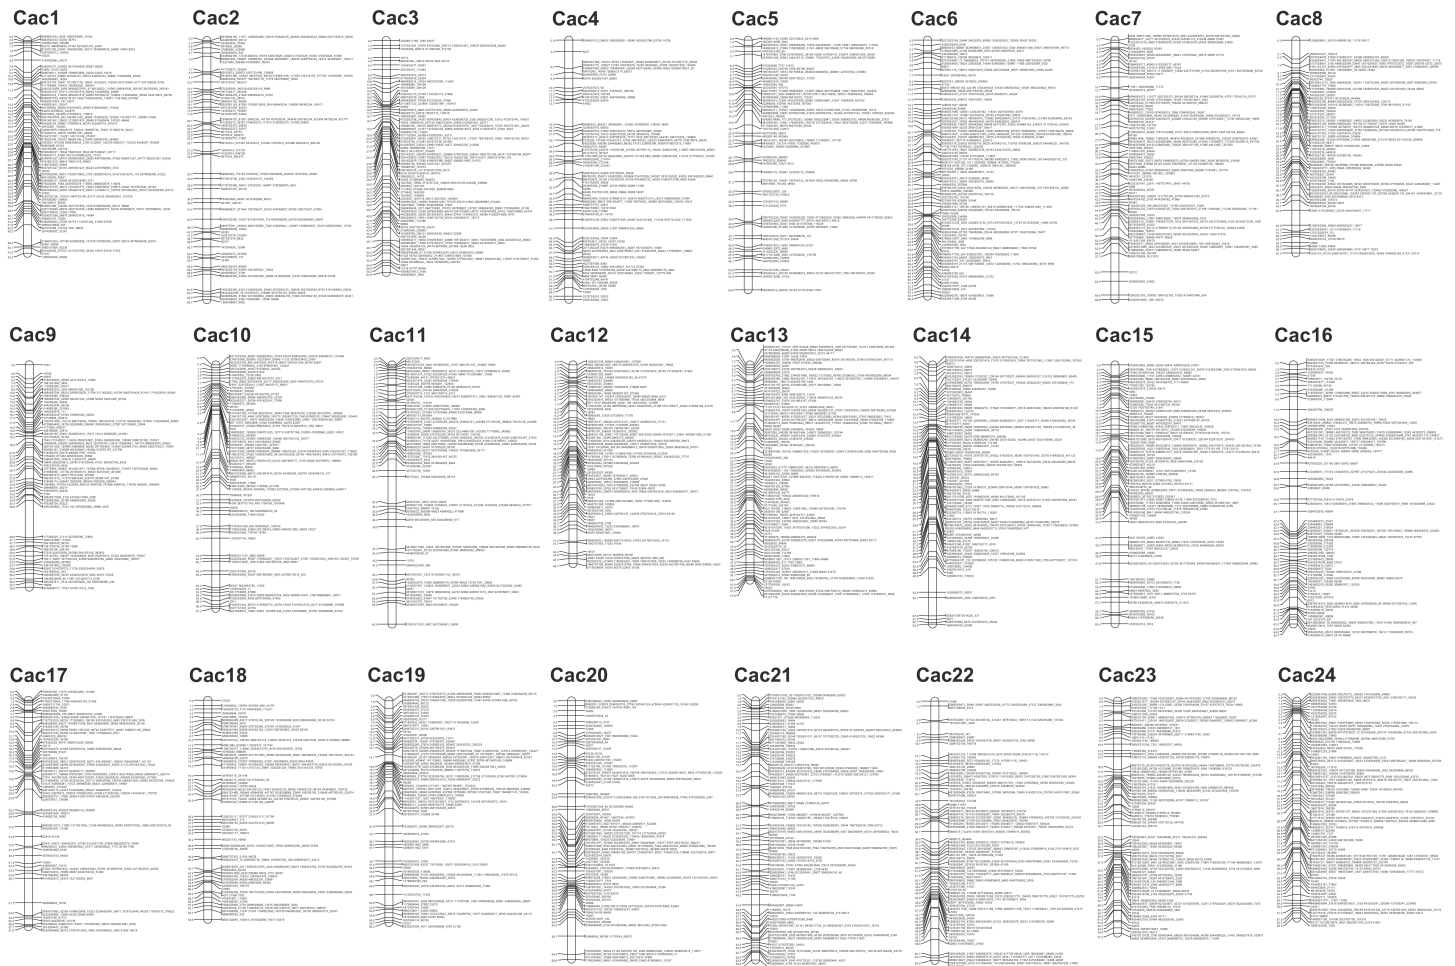

**Supplementary Fig. 5. Conserved synteny of *C. aceratus* chromosomes with other teleosts.**

a. Analysis of gene content shows a one-to-one correspondence between icefish and European sea bass chromosomes. Icefish-specific color-coded lines connect predicted orthologous genes and show that no translocations occurred in the icefish lineage after it diverged from the European sea bass lineage. b. Conservation of synteny between icefish chromosome Cac12 (LG12) and stickleback linkage group LGXIV (Gac14). Lines connecting individual orthologous genes are color coded based on the icefish genomic contig. c. Conserved synteny between sea bass LG19 (Dla19) and stickleback LGXIV (Gac14), which reveals that inversions and transpositions were frequent in the icefish lineage *after* it diverged from the sea bass lineage. d., e. The only detectable translocation in the icefish lineage involved a small section of the ancestral chromosome corresponding to medaka Ola6 and sea bass Dla6 being moved to a portion corresponding to Ola7 and Dla22-25 to provide icefish chromosome Cac7. Dot plots from Synolog (<http://catchenlab.life.illinois.edu/chromonomer/>) show orthologs and paralogs of genes along Cac7 in the order they appear on Cac7 with a dot directly above the position of the icefish gene. Orthologous chromosome segments have many orthologs, while paralogous chromosome segments have a few paralogs plotted.

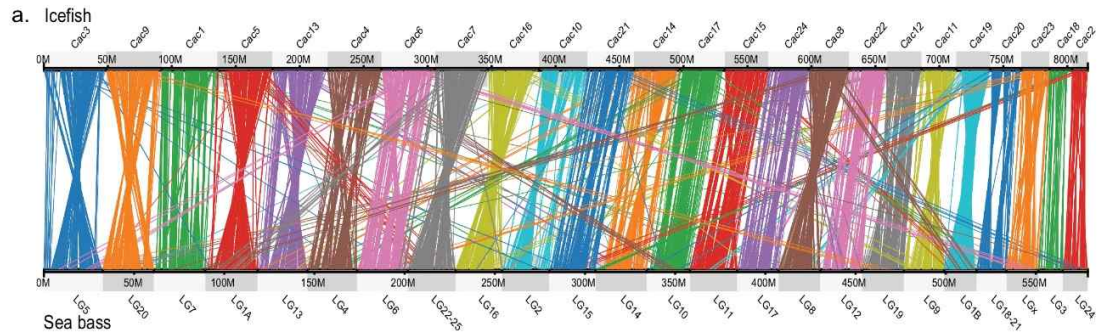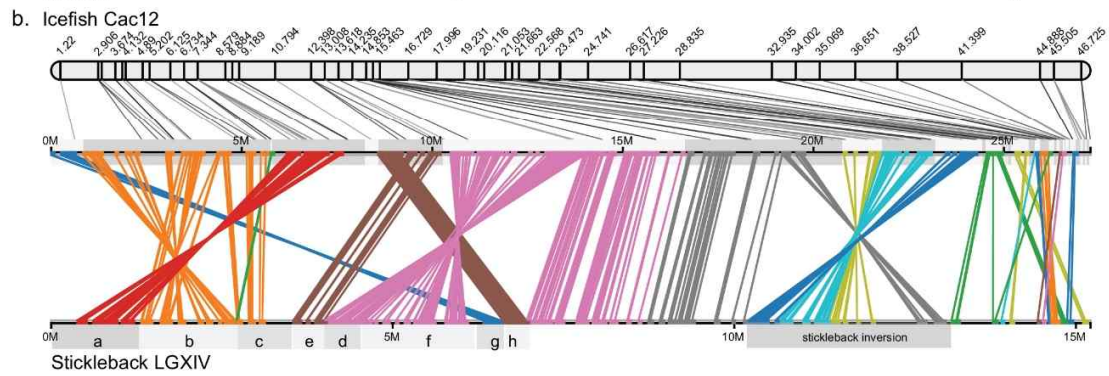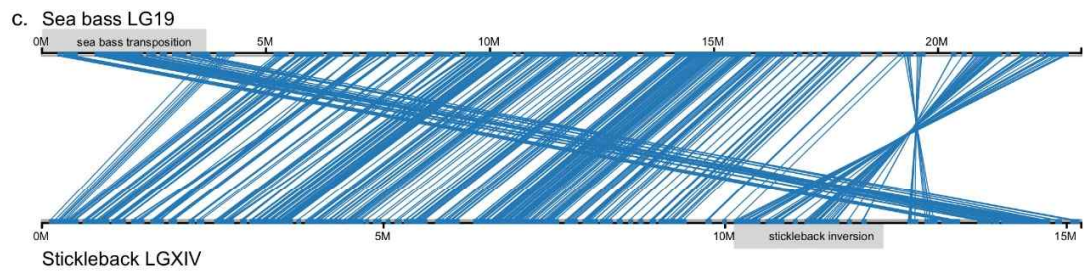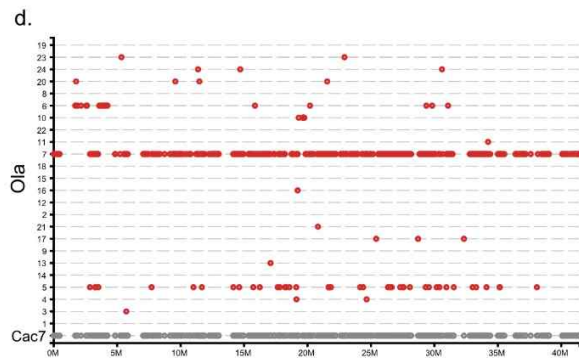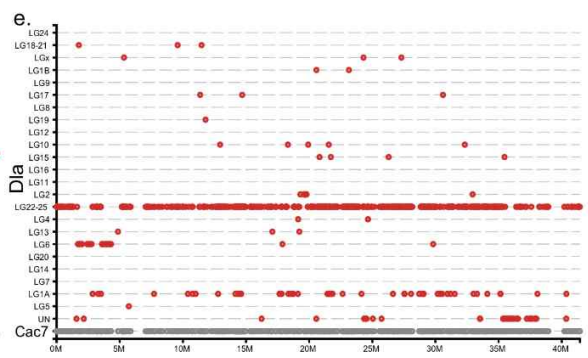









**Supplementary Fig. 8. Venn diagram of orthologous gene clusters for six teleost fishes.**

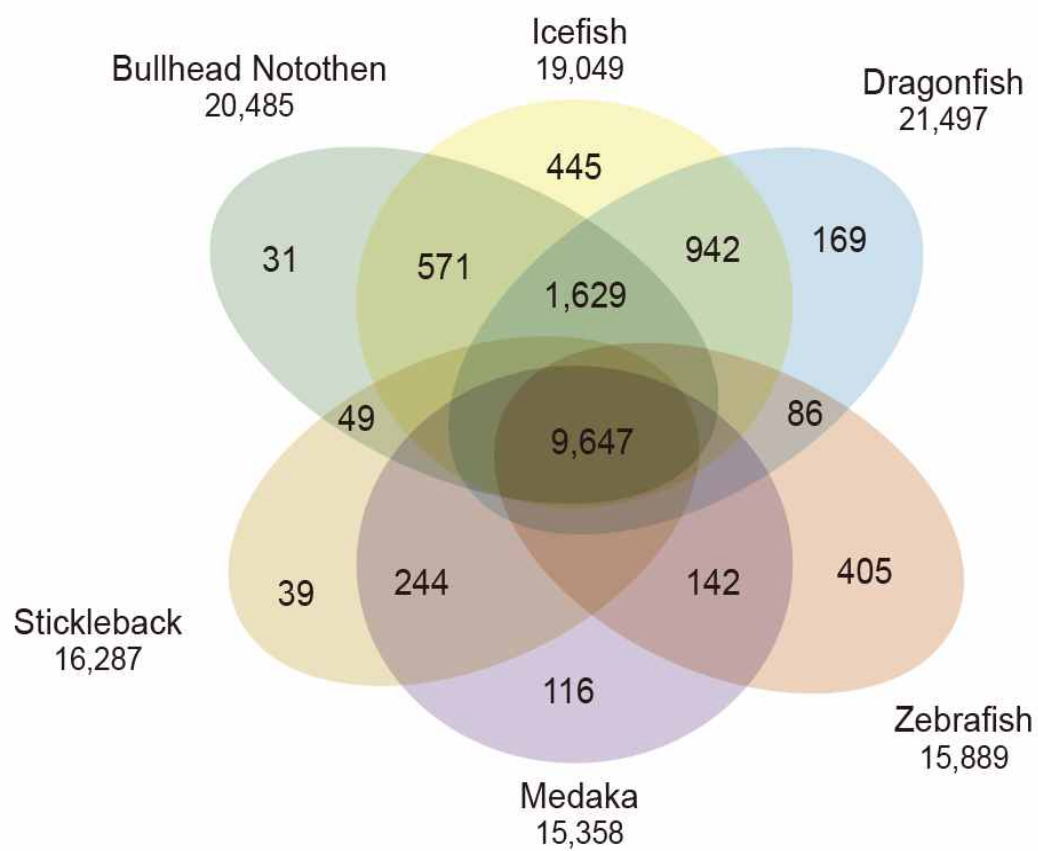

**Supplementary Fig. 9. Conserved synteny for *zpc3* and *zpc5* genes identified in the icefish genome.** The icefish *zpc3* and *zpc5* genes are tandemly duplicated in Ice\_000114.

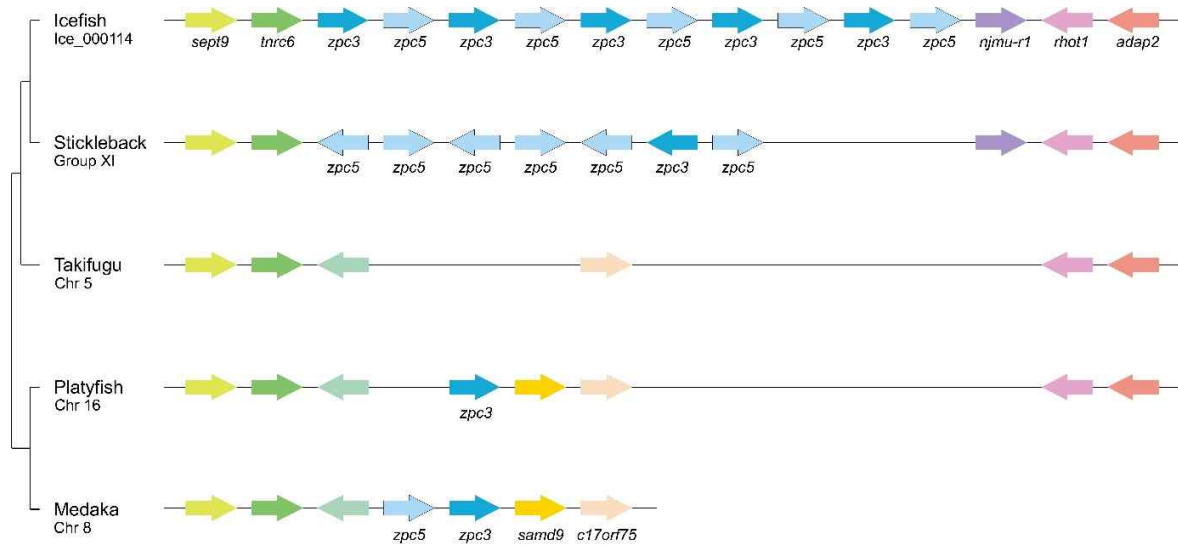



**Supplementary Fig. 11. Syntenic comparisons of icefish globin gene clusters.** Teleosts have two globin gene clusters. The LA cluster, which encodes both hemoglobin  $\alpha$ - and  $\beta$ -subunits, is adjacent to the *lcmt1* and *aquaporin* genes on one side and *rhbdf1b* on the other side. The MN cluster, which also encodes both hemoglobin  $\alpha$ - and  $\beta$ -subunits, has *rhbdf1a*, *mpg*, and *nrpl3* on one side and *kank2* on the other side. Loss of complete copies of  $\alpha$ - and  $\beta$ -globin genes is observed for both the LA and MN clusters in the icefish genome. Each arrow indicates a gene in the 5'→3' direction.  $\alpha$ - and  $\beta$ -globin clusters are shown by green and red boxes. The partial alpha globin gene containing only exon 3 is identified in the icefish LA cluster by a dashed box. This figure was updated from figure 1 of Opazo et al.<sup>4</sup>.

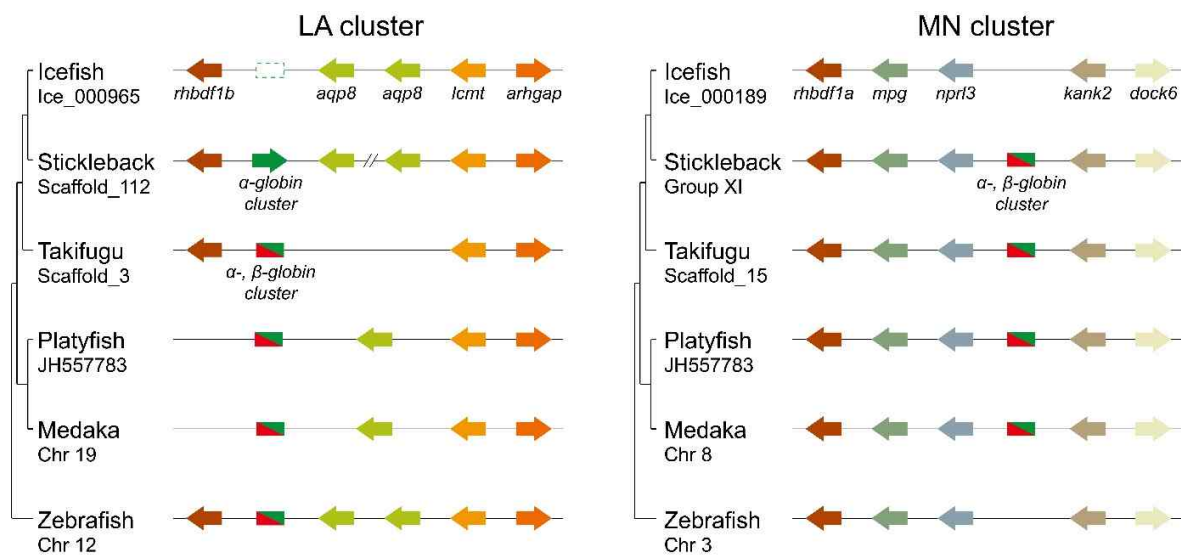

**Supplementary Fig. 12. Syntenic comparison of myoglobin and cytoglobin genes identified in icefish genome.** Genomic structure and syntenic comparisons for **a.** cytoglobin (*cygb1*) **b.** *cygb2*, **c.** myoglobin (*mb*) and **d.** neuroglobin (*ngb*) genes are shown within representative sequenced teleost genomes.

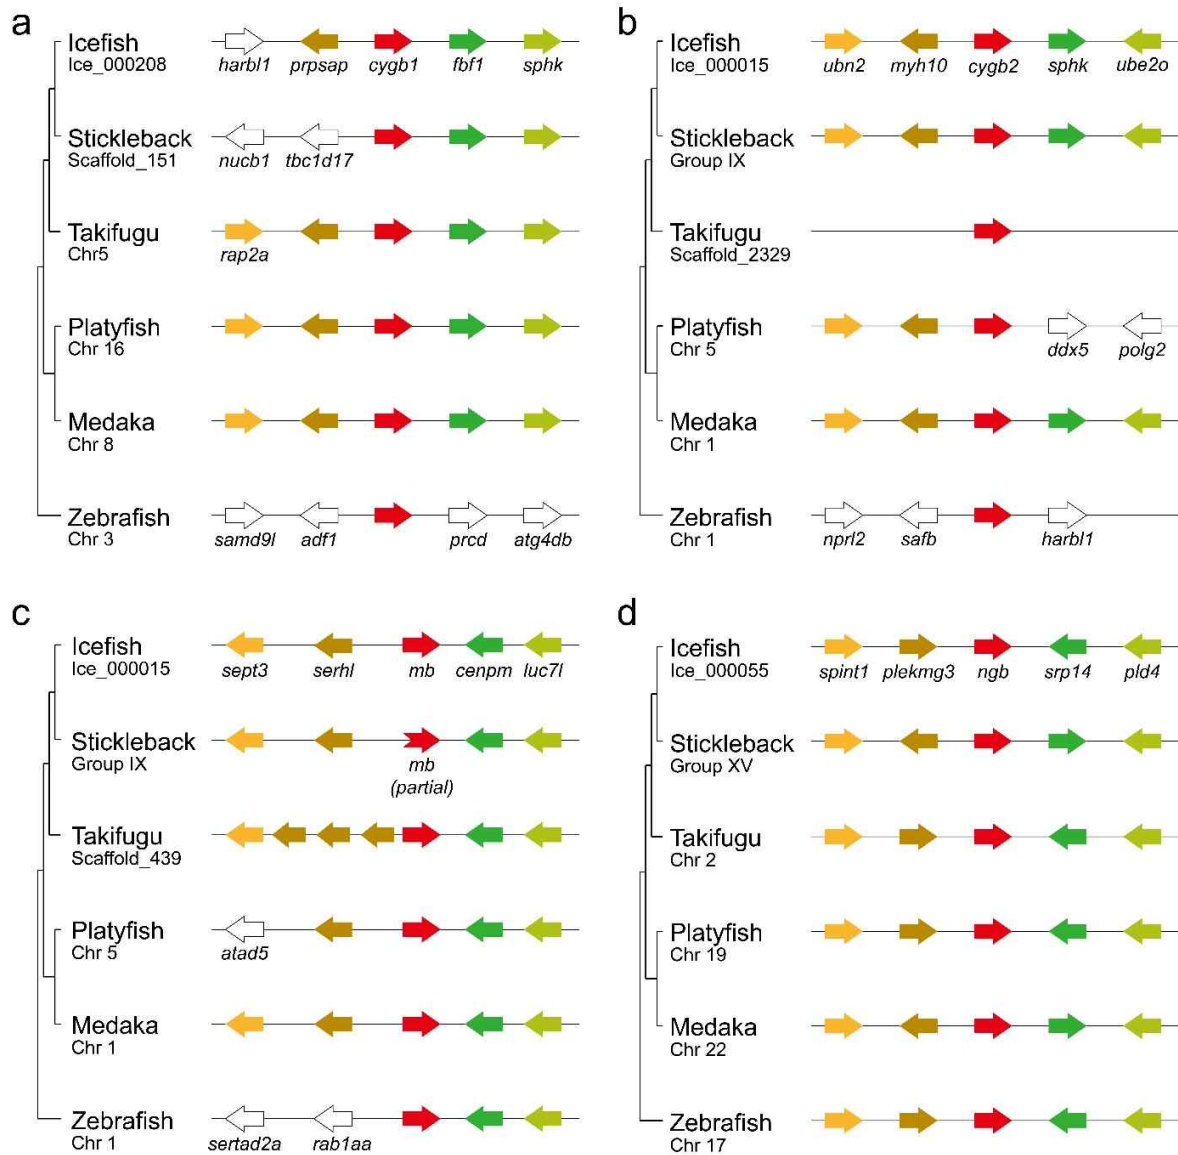

**Supplementary Fig. 13. Cladogram depicting expansion of NAD(P)H quinone dehydrogenase 1 (*nqo1*) genes in the icefish genome.** Comparison of genomic structure, conserved synteny, and phylogenetic relationships of icefish *nqo1* genes shown within representative sequenced teleost genomes. Icefish *nqo1* genes are distributed on five different contigs.

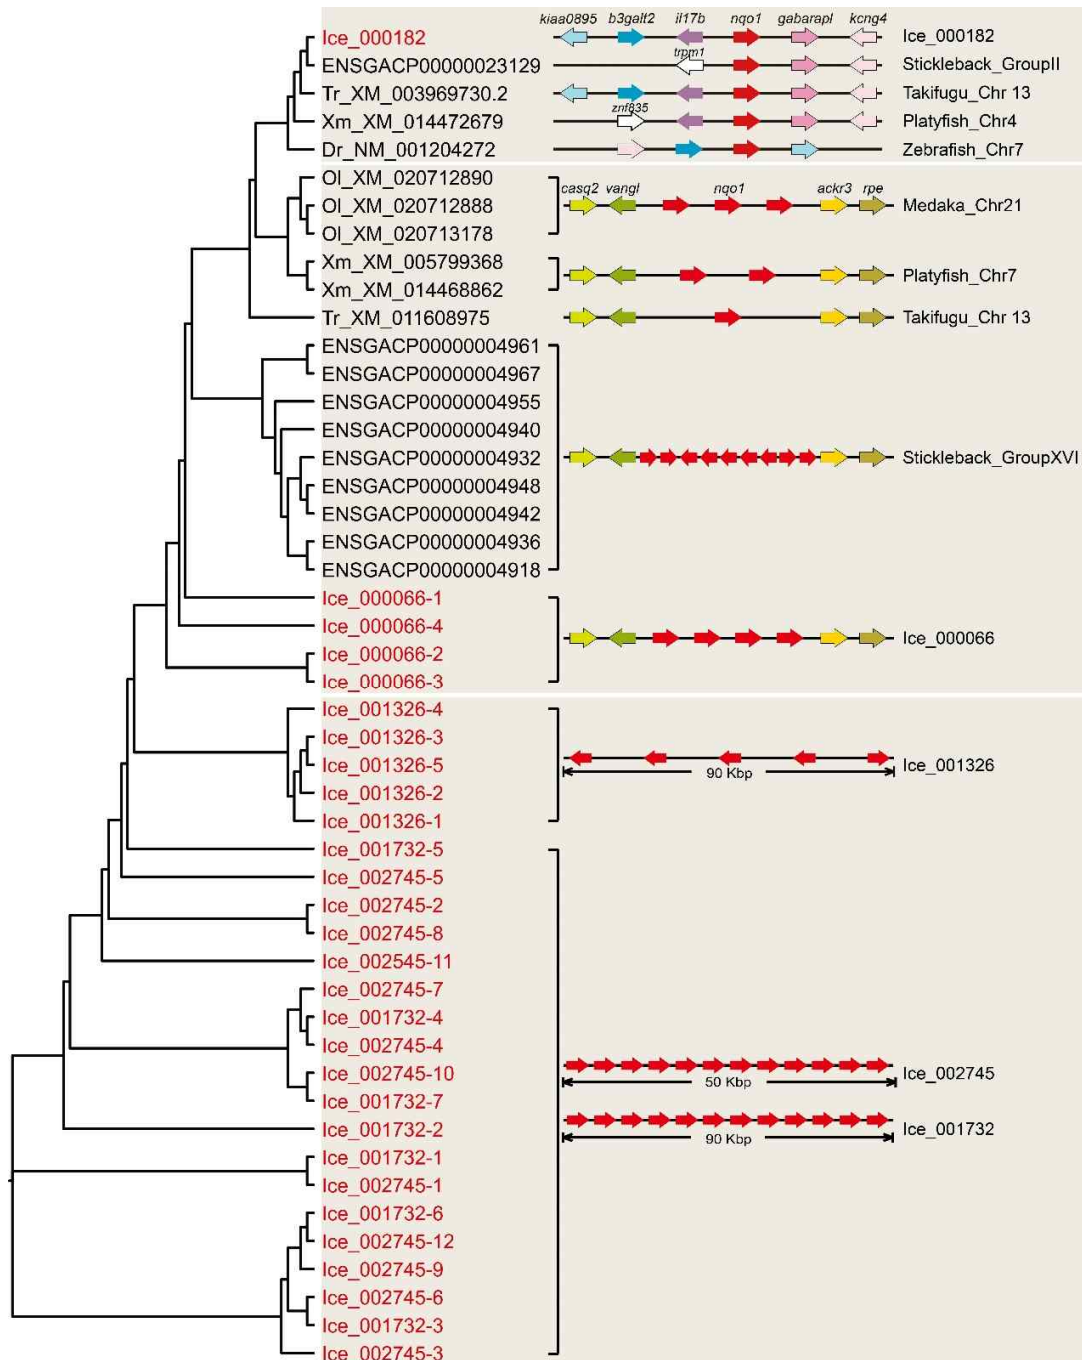

**Supplementary Fig. 14. The 8-oxoguanine DNA glycosylase (*ogg1*) gene is duplicated in the icefish genome. Other teleost genomes contain a single gene.**

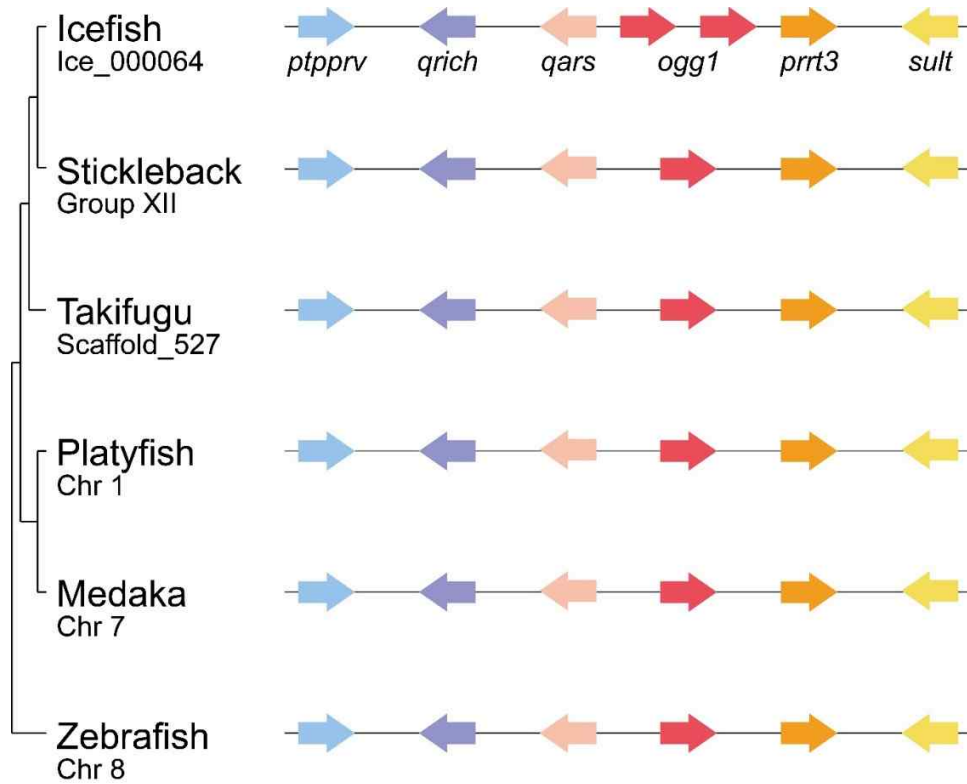



**Supplementary Fig. 15. Percentages of TEs in teleost genomes.** The amounts of LTR, SINE and LINE retrotransposons, DNA transposons, and unclassified elements (Unknown), as well as their respective proportions were estimated based on RepeatMasker outfiles.

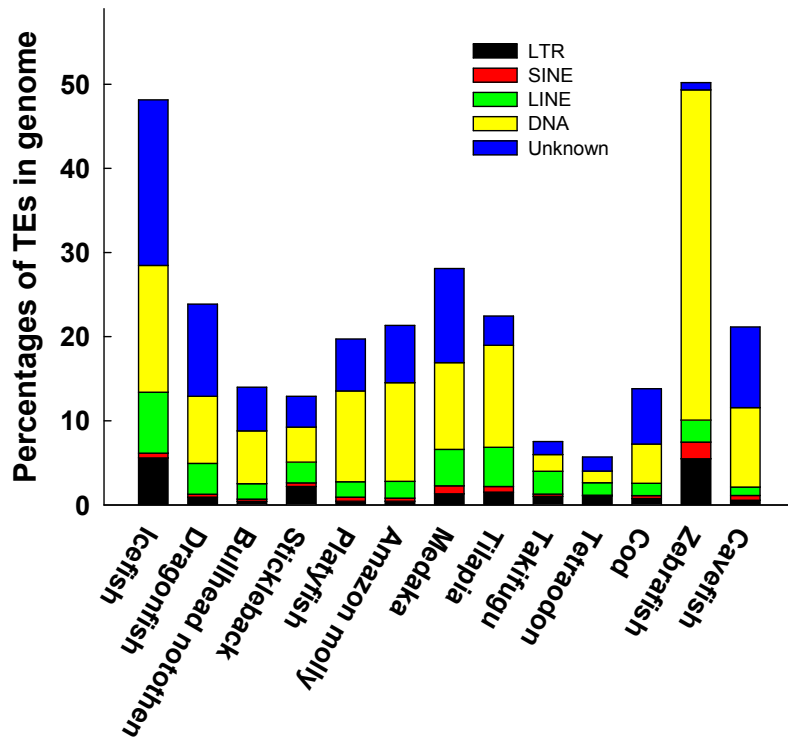



**Supplementary Fig. 17. Kimura distance-based copy divergence analysis of transposable elements in teleost genomes.** Graphs represent genome coverage (Y-axis) for each type of TE (DNA transposons, SINE, LINE, and LTR retrotransposons) in the different genomes analyzed, clustered to their corresponding consensus sequence according to Kimura distances (X-axis, K-value from 0 to 50). Right inserted square shows axes for all graph.

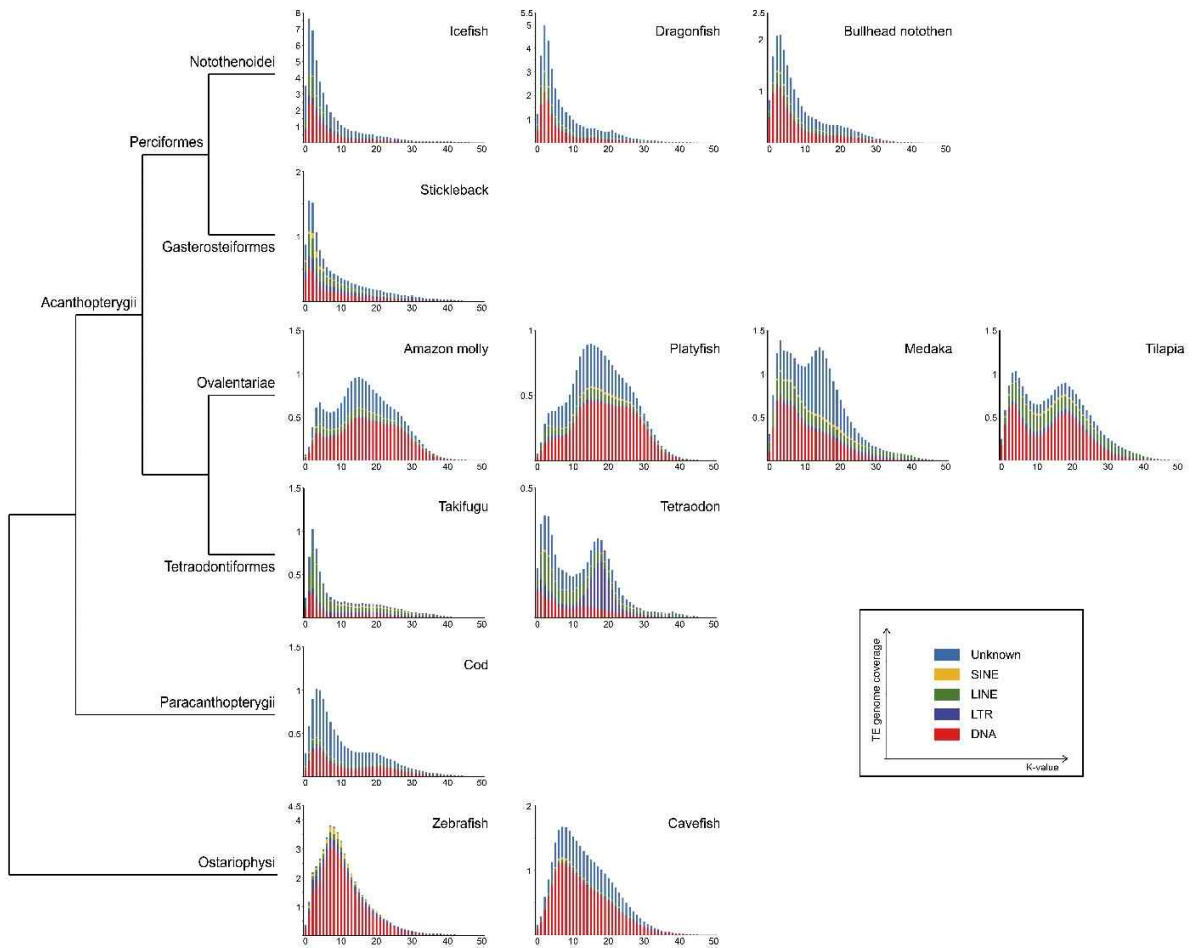

**Supplementary Table 1. Statistics for icefish genome sequencing using PacBio Sequel.**

| Library         | No. of Cells | No. of Reads | Total data (Mbp) | N50 read length (bp) | Mean read length (bp) |
|-----------------|--------------|--------------|------------------|----------------------|-----------------------|
| Polymerase read | 16           | 6,562,134    | 89,275           | 22,250               | 13,605                |
| Subread         |              | 8,434,974    | 89,045           | 16,203               | 10,557                |

**Supplementary Table 2. BUSCO scores for the completeness of the icefish genome sequence. (<http://busco.ezlab.org>)**

|                                     | Actinopterygii Gene Set | %    |
|-------------------------------------|-------------------------|------|
| Complete BUSCOs (C)                 | 4,123                   | 89.9 |
| Complete and single-copy BUSCOs (S) | 3,930                   | 85.7 |
| Complete and duplicated BUSCOs (D)  | 193                     | 4.2  |
| Fragmented BUSCOs (F)               | 164                     | 3.6  |
| Missing BUSCOs (M)                  | 297                     | 6.5  |
| Total BUSCO groups searched         | 4,584                   |      |

**Supplementary Table 3. Sequencing statistics for icefish transcriptome analysis.**

| Organ     | No. reads  | Total data (bp) | % reads mapping* |
|-----------|------------|-----------------|------------------|
| Brain     | 42,517,602 | 4,294,277,802   | 94.76            |
| Eye       | 48,799,334 | 4,928,732,734   | 95.45            |
| Gill      | 51,072,374 | 5,158,309,774   | 94.35            |
| Heart     | 56,781,088 | 5,734,889,888   | 92.23            |
| Intestine | 51,113,066 | 5,162,419,666   | 96.66            |
| Kidney    | 53,863,870 | 5,440,250,870   | 90.35            |
| Liver     | 78,598,880 | 7,938,486,880   | 86.68            |
| Muscle    | 45,374,108 | 4,582,784,908   | 87.23            |
| Ovary     | 49,080,678 | 4,957,148,478   | 91.09            |
| Skin      | 45,497,130 | 4,595,210,130   | 89.49            |
| Spleen    | 43,778,336 | 4,421,611,936   | 89.57            |
| Stomach   | 57,809,718 | 5,838,781,518   | 86.44            |

\*Data from each organ was mapped to assembled icefish genome using Tophat.

**Supplementary Table 4. General statistics of the functional annotation.**

|           |          | Number | Percent (%) |
|-----------|----------|--------|-------------|
| Total     |          | 30,773 |             |
| Annotated | Blastp   | 23,923 | 77.74       |
|           | Interpro | 20,684 | 67.21       |
|           | GO       | 16,671 | 54.17       |
|           | KEGG     | 19,893 | 64.64       |

**Supplementary Table 5. Sequencing statistics for icefish small-RNA transcriptome analysis.**

| <b>Organ</b>             | <b>Number of reads retained for analysis*</b> | <b>Number of reads being annotated</b> | <b>% reads being annotated</b> |
|--------------------------|-----------------------------------------------|----------------------------------------|--------------------------------|
| Pronephric kidney        | 4,818,658                                     | 4,281,988                              | 88.86                          |
| Pectoral girdle bone     | 9,459,845                                     | 7,820,112                              | 82.67                          |
| Heart ventricle          | 596,018                                       | 545,265                                | 91.48                          |
| Pectoral adductor muscle | 2,715,548                                     | 2,343,132                              | 86.29                          |
| Skeletal muscle          | 5,750,328                                     | 4,822,711                              | 83.87                          |

\*Passed sequence quality filter; passed size filter; have minimum of 5 counts



**Supplementary Table 6. Information of miRNA sequence of blackfin icefish.**

| Gene Name     | Sequence                                                                                                   | Location                      | Strand |
|---------------|------------------------------------------------------------------------------------------------------------|-------------------------------|--------|
| cac-let-7a-2  | GCTCCCAGGTTGAGGTAGTAGGTTGTATAGTTGAGAATTACACCCCGGGAGATAACTGTACAACCTCCTAGCTTCCCTGAGGTAC                      | LG13:9475996-9476081          | +      |
| cac-let-7a-3  | TCCTTTTGGGTGAGGTAGTAGGTTGTATAGTTTLAGGGTCAATCCCGAGCTGTAAAATGACTATACAATTTACTGTCTTTCCTGAAGCGACC               | LG23:16144495-16144586        | +      |
| cac-let-7a-4  | TCCCTCAGGTTGAGGTAGTAGGTTGTATAGTTCAGAGTGACACCTCAGGAGATAACTGTACAGCCTCCTAGCTTCCCTGAGGAAAC                     | LG14:29507401-29507487        | -      |
| cac-let-7a-5  | TCCTTCAGGTTGAGGTAGTAGGTTGTATAGTTTGGTGGGTGGGACTGCA CCTGTCAAGGTGATAACTATACAGTCTATTGCCTTCCCTGAGGAGTC          | LG7:23011503-23011599         | +      |
| cac-let-7a-6  | CCTGGCAAGGTGAGGTAGTAGGTTGTATAGTTTGTGGGATGGAGTAAA TCCTACTCAGGCGATAACTATACAGTCTAATACCTTCTTGAGGGGTACA ATGA    | LG5:14697071-14697171         | +      |
| cac-let-7a-7  | TCCTTTGGGGTGAGGTAGTAGGTTGTATAGTTTLAGGGTCATACCTTC CTGTCAGATAACTATACAACCTTACTGTCTTTCCTGAAGTGGCTG             | LG6:31060983-31061075         | -      |
| cac-let-7b-1  | TCGTACAGGGTGAGGTAGTAGGTTGTGTGGTTTCAGGGTTGTGATTGTA CCCATCAGGAGCTAACTGTACAACCTACTGCCTTCCCTGGAGGGC            | LG23:16145238-16145332        | +      |
| cac-let-7b-2  | TCGAACAGGGTGAGGTAGTAGGTTGTGTGGTTTCAGGGTAGTGATTTTG CCCAATAAGGAGATAACTGTACAACCTACCGCCTTCCCTGAAGGGCA          | LG6:31060415-31060510         | -      |
| cac-let-7c-2  | GCATCCGGGTTGAGGTAGTAGGTTGTATGGTTTAGAATGACATCCTGGG AGTTAACTGTACAACCTTCTAGCTTTCCTTGAGGACAC                   | LG14:5184609-5184694          | +      |
| cac-let-7d-1  | CTCTGCAGTGTGAGGTAGTTGGTTGTATGGTTTCGCATAATAAACAGCA CCGAGATAACTCTACAACCTTCTAGCTTCCCTGCGGAGTC                 | LG16:19224686-19224775        | +      |
| cac-let-7d-2  | CTCTGCAGTTGAGGTAGTTGGTTGTATGGTTTCGCATCATAAACAGCC TGGAGATAACTGTACAACCTTCTAGCTTCCCTGCGGCGT                   | Ice_Fa_000667F :208836-208924 | -      |
| cac-let-7e-1  | TCCTTGGGGCTGAGGTAGTAGATTGAATAGTTGTGGGGTTGTGTAACCT CTTTTGAGATAACTATACAATCTACTGTCTTCCCAAGGAGAC               | LG7:23011252-23011344         | +      |
| cac-let-7e-2  | TCCTTAAGGCTGAGGTAGTAGATTGAATAGTTGTGGGGTTTTTGTCTC CCTCTGAGATAACTATACAATCTACTGTCTTCCCTAAGGAGAC               | LG5:14696745-14696836         | +      |
| cac-let-7g-1  | AGCTGTGGGATGAGGTAGTAGTTTGTATAGTTTLAGGATCACACCAGAT CTGGGAGATAACTATACAGCCTACTCTTTCTCACGGCAACC                | LG7:32952936-32953027         | -      |
| cac-let-7g-2  | TGCTGTGGGATGAGGTAGTAGTTTGTATAGTTTLAGGATCACACCAGAT CTGGGAGATAACTATACAGTCTACTGTCTTCTTATGGCTACG               | LG7:21074106-21074197         | +      |
| cac-let-7h-1  | TGTGCTGTGGTGAGGTAGTAAGTTGTGTTGTTGTTGGGGATAAAGGATTG TTCACCCGTTTCAGGAGATAACTATACAACCTACTGCCTTCCCTCAGTGC AGGC | LG7:21074284-21074385         | +      |
| cac-let-7i-1  | ATGCACTGGCTGAGGTAGTAGTTTGTGCTGTTGGTTGGGTTGTGACACT GCCCGCTATGGAGATGACTGCGCAATCTACTGCCTTGTAGTGTGGT           | LG6:31422588-31422684         | +      |
| cac-let-7i-2  | ATGCGCTGGTTGAGGTAGTAGTTTGTGCTGTTGGTGGGTTGTTATATT ACCCCTTGTGGAGATGACTGCGCAATCTACTGCCTTGTGGCGCTGGT           | LG23:15956748-15956844        | -      |
| cac-let-7j    | CACCTTGGTCTGAGGTAGTTGTTGTACAGTTGAGGGTCTGTGATTCTG CCCCATACAGGAGCTAACTGTACAACCTGACTGCCTTGCCACGGTTGA          | LG5:25524602-25524699         | -      |
| cac-mir-100-1 | CATGGTCCCAAACCCGTAGATCCGAACCTGTGTTATCTGACACCACAAG CTTGTGTCTACAGGTCTGCGTCTG                                 | LG13:9475205-9475277          | +      |
| cac-mir-100-2 | AGCTGCCACAAACCCGTAGATCCGAACCTGTGGTGACTGGCTGCACAA GCTCGTATCTATAGGTATGTGTCTTCTCTG                            | LG14:29508344-29508420        | -      |
| cac-mir-101a  | CTTCCCTGGTTTCAGTTATCACAGTGTGCTGTGCTGCCCATCGAAGGTA CAGTACTGTGATAACTGAAGGATGGCTGCC                           | Ice_Fa_000733F :206957-207035 | +      |
| cac-mir-101b  | CTGTCCATTTTCAGTTATCATGGTACCCGGTGTGTGTCCTCTTAAGTAC AGTACTATGATAACTGAAGATTGGCAGTG                            | LG12:15446173-15446251        | +      |
| cac-mir-103a  | CTTTCGCTTCAGCCTTTTACGGTGTGCTGCTTGTGACGTCTTGATCAAGC AGCATTGTACAGGGCTATGAAGCGTAGAG                           | LG22:23549660-23549739        | +      |

|                |                                                                                                  |                                  |   |
|----------------|--------------------------------------------------------------------------------------------------|----------------------------------|---|
| cac-mir-103b   | CTACGCTTTTAGCCTTTTACAGTGCTGCCTGTCTGATCATGTTCAAGC<br>AGCATTGTACAGGGCTATGACAGCATAGAG               | LG10:28275928-<br>28276007       | - |
| cac-mir-107a   | GTGTGCTGTGAGCTTCTTTACAGTGTGCCTGTGGCATGGGGATCAAG<br>CAGCATTGTACAGGGCTATCACTGCACAC                 | LG15:28318936-<br>28319013       | - |
| cac-mir-10a    | CACCTATATATACCCTGTAGATCCGAATTTGTGTAAAAATAGCAGCAGC<br>CACAAATTCGCTTCTTGGGGAGTATGTAGGTGA           | LG19:6743208-<br>6743289         | - |
| cac-mir-10b-1  | CGTCTATATATACCCTGTAGAACCGAATTTGTGTGATAAAACCACAATC<br>ACAGATTGATTCTAGGGGAGTATATGGTCGA             | LG21:18076974-<br>18077054       | - |
| cac-mir-10b-2  | TGTCTATATGTACCCTGTAGAACCGAATTTGTGTGAAGTACAAACAATC<br>GCAAATACGTCTCTACAGGAATATATGGGCAA            | LG7:22098995-<br>22099075        | + |
| cac-mir-10c    | CTTCTATATCTACCCTGTAGATCCGATTTGTGTACAAATCATTGAAAC<br>AATCACAAATTCGCTTCTAGGGGAGTATATAGTG           | LG8:1699781-<br>1699863          | + |
| cac-mir-10d    | CGCCCCTACATACCCTGTAGAACCGAATTTGTGTGCGGAGCTGCTCAGAC<br>ACAGATTGGGTTCTAGGGGAGTCTATGGGCGATGACTAACCA | Ice_Fa_000968F<br>:130223-130313 | - |
| cac-mir-1-1    | TGCTTGGGGGACATACTTCTGTATATGCCCATATGAACAAGAGCAACTA<br>TGGAATGTAAAGAAGTATGTATCCAGGTGG              | Ice_Fa_000302F<br>:824290-824370 | - |
| cac-mir-1-2    | CTCCTTGGTGTACATACTTCTTTATGTACCCATATGAACATATGATAGCT<br>ATGGAATGTAAAGAAGTATGTATTCTTAGTGGG          | LG17:22231114-<br>22231196       | - |
| cac-mir-122    | TCCAGAGCTGTGGAGTGTGACAATGGTGTGGTGTCTGTGAATCAAAC<br>GCCATTATCACACTAAATAGCTCCAGTGTGAAA             | LG12:8779683-<br>8779764         | + |
| cac-mir-124-1  | TTGAGCTCTTTGTGTTCACAGTGGACCTTGATTTAATTTCAATACAATTA<br>AGGCACGCGGTGAATGCCAAGAGAGAAGCC             | Ice_Fa_000169F<br>:967395-967474 | + |
| cac-mir-124-2  | TGTGTCTCTCCGTGTTCACAGCGGACCTTGATTTAATGTCTTACAATTA<br>GGCAGCGGTGAATGCCAAGAGATGAGCC                | LG20:18871716-<br>18871794       | + |
| cac-mir-124-3  | TGTCACCTGTGCGTGTTCACAGCGGACCTTGATTTAATGTCCATAACAATT<br>AAGGCACGCGGTGAATGCCAAGAGAGGAATC           | LG7:26145867-<br>26145946        | - |
| cac-mir-124-5  | CGTCTCTCCTCGTGTTCACAGCGGACCTTGATTTAAATGTCCATAACAATT<br>AAGGCACGCGGTGAATGCCAAGAGAGTACC            | LG24:30332422-<br>30332502       | - |
| cac-mir-125a-1 | TGCCCCTGTCCCTGAGACCCTAACCTGTGAGGTCAAAGTAGGTCAC<br>AGGTGAGGTCTCGGGAACAGGGCTGCAT                   | LG16:19230756-<br>19230833       | + |
| cac-mir-125a-2 | TGCTTATTGTCCCTGAGACCCTAACCTGTGATGATGTGAAAGGTCAC<br>AGGTGAGGTCTTGGGAACAAAGTCGCAT                  | Ice_Fa_000667F<br>:204664-204741 | - |
| cac-mir-125b-2 | CCTCTCTCATTCCCTGAGACCCTAACCTGTGACGTTTTCTGCATGTGCAC<br>GGGTTGGGTTCTCGGGAGCTGCGAGGGGCG             | LG14:29502955-<br>29503034       | - |
| cac-mir-125b-3 | CTTACCTGTCCCTGAGACCCTAACCTGTGAGCTCTTTAATAAAAAA<br>CCACGGTTAGGCTCTTGGGACGTGGGCGGAGG               | LG14:5192530-<br>5192611         | + |
| cac-mir-125c   | TCTCTCTCCGTCCCTGAGACCCTAACCTGTGACGTTGTGTTTTTCATGTCC<br>ACGGGTTAGGCTCTCGGGAGCTGAGGGGGAT           | LG13:9481803-<br>9481883         | + |
| cac-mir-126b   | CCTCGCGGTCCATTATTACTTTTGGTACGCGCTATGCCACTCTCAACTCG<br>TACCGTGAGTAATAATGCACTGCGACTGG              | LG12:3547849-<br>3547927         | + |
| cac-mir-128-1  | AGGCGGGATTGCGGGCCGGGACGCTGTCTGAGAGACCTCTATGAATCT<br>CACAGTGAACCGGTCTCTTTGACGCTCT                 | Ice_Fa_000589F<br>:76688-76765   | + |
| cac-mir-128-2  | CAGTAGAGGAGGGGGCCGTTACTGTGAGAGATGTAGTCTGAGGGTC<br>TCACAGTGAACCGGTCTCTTTTCTGCTGTCT                | LG11:10319945-<br>10320023       | + |
| cac-mir-128-3  | AGGCGGGATTGCGGGCCGGGACGCTGTCTGAGAGACCTCTATGAATCT<br>CACAGTGAACCGGTCTCTTTTGCAGCTCT                | LG2:10617292-<br>10617369        | + |
| cac-mir-129-1a | CTTACGAAATCTTTTGGCGTCTGGGCTTGTCTGTTTCATAACTATTAATCT<br>GGGAAGCCCTTACCCCAAAAAGCATTGCGGAGGG        | LG6:34110770-<br>34110854        | - |
| cac-mir-129-1b | CGTCACGAATCTTTTGGCGTCTGGGCTTGTCTGTGCATACATGAATCTG<br>GGAAGCCCTTACCCCAAAAAGCATTGTTGGAGGA          | LG3:18585819-<br>18585901        | - |
| cac-mir-129-2a | CTTTTACAGTCTTTTGGCGTCTGGGCTTGTCTGCAATGACTATCCAGG<br>AAGCCCTTACCCCAAAAAGCATCTACAAGGGA             | LG6:20318027-<br>20318108        | - |
| cac-mir-129-2b | CTGTGTGGTCTTTTGGCGTCTGGGCTTGTCTGTTTCTAAGGCAGTAGC<br>CAGGAAGCCCTTACCCCAAAAAGTATCTGCACTGGACTCTGG   | LG23:6689968-<br>6690058         | + |

|                |                                                                                                                |                                  |   |
|----------------|----------------------------------------------------------------------------------------------------------------|----------------------------------|---|
| cac-mir-130b   | TCTGCTTGACACTCTTTCCTGTTGCACTACTGTGGGAGCTGCAGCAAG<br>CAGTGCAATAATGAAAGGGCATTGGCTCAGCT                           | LG9:1598929-<br>1599008          | - |
| cac-mir-130c-1 | GTTGTCCAAAGCCTTTTTTCTGTTGACTACTGTGAAATCAGATGAGCA<br>GTGCAATATTTAAAAGGGCATTGGCTGACA                             | LG9:1604812-<br>1604889          | - |
| cac-mir-130c-2 | GGAGTCTGATGGTGTCCATGTTGTTGTCCACTGCCCTTTTTTTTGGTGCA<br>CTACTGGACATTGAGGTGAGCAGTGAATATTTAAAAGGGCATTGGCTG<br>ATG  | LG12:14133244-<br>14133344       | - |
| cac-mir-132-1  | CTCCATGGCGACCGTGGCATTAGATTGTTACTGTAGCAACAGCACCCT<br>GGTAACAGTCTACAGCCATGGTCGCTAGGGGGCA                         | LG13:18746562-<br>18746644       | - |
| cac-mir-132-2  | CTCCATGGCGACCGTGGCTTTAGATTGTTACTGTAGCAACAGCACCCTG<br>GTAACAGTCTACAGCCATGGTCGTTAGGGGCGAG                        | LG14:22162712-<br>22162793       | + |
| cac-mir-133a-1 | TTGCTAAAGCTGGTAAAAATGGAACCAAATCACTCTTGAATGGATTGG<br>TCCCCTTCAACCAGCTGTAGCTATGCTT                               | LG17:22227837-<br>22227913       | - |
| cac-mir-133a-2 | TTGCTAAAGCTGGTAAAAATGGAACCAAATCAACCGTTCAATGGATTG<br>GTCCCCTTCAACCAGCTGTAGCTGTGCAT                              | Ice_Fa_000302F<br>:800380-800456 | - |
| cac-mir-133b   | CCTTGCTGTGGCTGGTCAAACGGAACCAAGTCAGGTGTTTCTGTGAGGT<br>TTGGTCCCCTTCAACCAGCTACTGCGTCGTG                           | Ice_Fa_000312F<br>:266116-266195 | + |
| cac-mir-135a-1 | CGTTGTGCTTATGGCTTTTTATTCTACGTGATGGCCGATGGGTTTCATG<br>TAGGAGTAGAAGCCACTAAACACGCGG                               | Ice_Fa_001615F<br>:35347-35423   | + |
| cac-mir-135a-2 | CAACGTGACTATGGCTTTTTATTCTATGTGATGATGAAACATGTTTCGT<br>GTAGGGATAGAAGCCATTTTACACG                                 | LG6:22856818-<br>22856892        | + |
| cac-mir-135b   | TAGTGCCTGTATGGCTTTTTATTCTATCTGACTGTACTGATGGTTCAT<br>ATAGGGATGGAAGCCATGCACCGCGCTGGG                             | LG7:15956568-<br>15956647        | - |
| cac-mir-135c-1 | GCTGTGTTTTTATGGCTTTCTATTCTATGTGATTTTTCTCTGGCATGTCA<br>CATAGGGTCTTAAGCCATTGGGTACAGAGCGGGAGATCTGCAGACGGG<br>GA   | LG5:39674953-<br>39675053        | + |
| cac-mir-135c-2 | AACTGTGCTTATGGCTTTCTATTCTATGTGAGTTTGTTCGAACATTT<br>ATGTAGGGTTCAAAGCCATTGGATACACTGGATAGTCAC                     | LG7:30997971-<br>30998061        | + |
| cac-mir-137-1  | AGGTGGAACGACCGTTTGTCTCCCGTCTCGACCACGGGTATTCTTGGGTT<br>GATAATACAGATGTCGATGTTATTGCTTGAGAATACGCGTAGCTGAGCG<br>GAA | LG8:29677814-<br>29677914        | - |
| cac-mir-137-2  | GGAGGTGGGCCTCTTTTGTCTCCCGTCTCGACCACGGGTATTCTTGGGTT<br>GATAATACAGATGTGGATGTTATTGCTTGAGAATACGCGTAGCTGAGTG<br>GAA | LG1:23865642-<br>23865742        | - |
| cac-mir-138    | GGGGAGGGTCAGCTGGTGTGTAATCAGGCCGCTGACGCGTCACACA<br>CGGCTTCTTCAACAACCCAGGGACCCTCCCTACTACTTCTCTGC                 | Ice_Fa_000630F<br>:37231-37321   | - |
| cac-mir-1388   | TAGTTCTTCGAGGACTGTCTACCTGAGAATGGTGATTTTCAGGCTCAAT<br>CTCAGGTTTCGTCAGCCATGAAAAGCTAAC                            | LG7:25907325-<br>25907403        | + |
| cac-mir-138b   | TGTGTGCTGCAGCTGGTGTGTAATCAGGCCGATGACAGACACCTCCT<br>AAAACCCGGCTATTTCAACAACACAGGGTGGCACCGCACCCAC                 | LG6:10428335-<br>10428425        | - |
| cac-mir-138bb  | GGGGCGGGACAGCTGGTGTGTAATCAGGCCGCCGAAATCCAAGGAC<br>CGGCTACTTCCAACACACAGGGTCCCACCCTCACCCCTCACAT                  | LG11:20343644-<br>20343734       | - |
| cac-mir-139    | TTGGCTGTATTCTACAGTGCATGTGTCTCCAGTGTTAGTGATGCTACTG<br>GAGACCAAGCTCTGTTGGAATAACAATCA                             | LG13:30614625-<br>30614702       | + |
| cac-mir-140    | AGTGTACAGTCAGTGGTTTTACCCTATGGTAGGTGACATCATGCTGTT<br>TACCACAGGGTAGAACCACGGACGGGATGTTG                           | LG7:4303492-<br>4303572          | + |
| cac-mir-142a   | CAGTCATCCATAAAGTAGAAAGCACTACTAACTCCTCGCCACAGTGT<br>AGTGTTTCTACTTTATGGATGAGTGT                                  | LG14:11530310-<br>11530384       | + |
| cac-mir-142b   | TTGTCACCCATAAAGTAGAAAGCACTACTAAACGTCATTACACAGTGTA<br>GTGTTTCTACTTTATGGATGAGTAT                                 | LG13:17534039-<br>17534113       | - |
| cac-mir-143    | CCAATCCAGACAGATGAGGTGAGGGTCAGAGTTTGAAGAAGGGGGGAG<br>GGGGGCGTGTTCAGATCTATGGTTCAGATGAAGCTCTGTAGCTCAAGGC<br>AGTTT | LG24:26719997-<br>26720097       | - |
| cac-mir-144    | TGCCCGGACAGGATATCATCTTATACTGTAAGTTAATAAAGAGACAC<br>TACAGTATAGATGATGTAAGTTAATAAAGAGACAC                         | LG14:11099725-<br>11099802       | - |

|                |                                                                                                              |                            |   |
|----------------|--------------------------------------------------------------------------------------------------------------|----------------------------|---|
| cac-mir-145    | CTTCCATTGTGGCCAGTTTTACAGGAATCAGGAAGTCAATGTTATAGTGATAAATCTATTACATCTTATATTTGTTGTGTGAGTCTTAGGCTGACAGA           | LG17:32176763-32176863     | - |
| cac-mir-146a   | TGCTGTACTATGAGAAGTGAATTCATAGATGGTGGTGTTCAGGTGCATCTATGGGCTTAGTCTTTTGAATGGTACT                                 | LG15:18765471-18765552     | + |
| cac-mir-148    | TTTCCAAATAAAGTTCTGTGATACACTTAGACTCTAATTGCCTGCAGTCAGTGCATTACAGAAGTTGTTTTGTGAGT                                | LG21:17936178-17936255     | - |
| cac-mir-152    | TTCTGGTCTAAGTTCTGTGATACACTCCGACTGTGAATCTATGCTAGTCAGTGCATAACAGAAGTTTGTCCCGGCTCT                               | LG8:2567655-2567733        | - |
| cac-mir-153a-1 | CCTCCTCCCCCTCCTAACTAGCGGTTGCCAGTGCATTTTTGTGATGTTGCAGCTAGTAATATGAGCCAGTTGCATAGTCACAAAAGTGATCATTGAGA           | Ice_Fa_001706F:9962-10062  | - |
| cac-mir-153a-2 | CACTAAGCGCTTTTCTACCTCGTTCTTAGGTTTCAGCTCTTTGGGAGAATTGTGTAACACACCCCAACATTGCATAGTCACAAAAGTGACTTTGAACGG          | LG22:23619626-23619726     | + |
| cac-mir-153b   | GCGGCGGGTTAAACTGAACATATCTGTCTGTGTCATTCTTGTGGTTTGCAGCTAGTTGTGTCTCCAGTTGCATAGTCACAAAATGATCATGGACTGAT           | Ice_Fa_003589F:21741-21841 | - |
| cac-mir-153c   | CCAGTGTCATTTTTGTGATTTGCAGCTAGTACTCTGGCTCCAGTTGCATAGTCACAAAATGAGCATTGGCAGGT                                   | LG21:26060585-26060659     | - |
| cac-mir-155    | CATGGTGAGGTTAATGCTAATCGTGATAGGGGTTGTTTATTACCAGACA CCTAACATGTTAGCATTAGCTTCACTCTGGG                            | LG3:26468235-26468314      | + |
| cac-mir-15a-2  | GGCGATGCTGTAGCAGCACGGAATGGTTTGTGGGTTACACAGAGATGCAGGCCATGCTGTGCTGCCGCAGAAGAGCCT                               | LG21:28574032-28574109     | + |
| cac-mir-15b    | GGGTGCGCTCTAGCAGCACATCATGTTTGCAGATATTGCTGAATCAC TCCAAATCATTGTGCTGCCACCGTGAGCCCTG                             | LG18:1184741-1184823       | - |
| cac-mir-15c    | TAGACTGCTATAGCAGCGCATCATGGTTTGAACAGTGTGAAAAGGTGCGAACCATTATTGCTGCTTTAGAATTTT                                  | LG13:22636013-22636090     | + |
| cac-mir-16a    | TGCCACGCTTAGCAGCACGTAATATTGGCGTGTGAGACCCCAACCCCAATATTGGCAGTGCTGCTTCACTGTGGCCGG                               | LG13:22636252-22636331     | + |
| cac-mir-16c    | CGCCTTACTGTAGCAGCACGTAATATTGGAGTTAAGACTTTAGCTGAAGCCTCCAGTATTGATCGTGTGCTGAAGCAAAGCTG                          | LG21:28574235-28574319     | + |
| cac-mir-1788   | ATACAGTCCAGCTTTCGAGGCTTGTTTAAGTTGCTGCGACTCTTACTTGGACACAGGCAGCTAAAGCAAGTCTGGGATGCAGAGACA                      | LG21:12236854-12236942     | + |
| cac-mir-17a-1  | TGTGTATTGTCAAAGTGCTTACAGTGCAGGTAGTTCTATGTCATACCTACTGCAATGGAGGCACTTACAGCAATACCCTGA                            | LG3:26485595-26485675      | + |
| cac-mir-17a-2  | ACTGTAGTGTCAAAGTGCTTACAGTGCAGGTAGTTTATAAGATCTACTGCAGTGAAGGCACTTTCAGCACTATTCTGA                               | LG21:17070943-17071021     | + |
| cac-mir-17a-3  | AGTTTGTGATAAAGTGCTTACAGTGCAGGTAGTATTATAACCTGGCCTACTGCAATGTGAGCACTTCTTTCCACGGCG                               | LG10:28714426-28714505     | - |
| cac-mir-181a-1 | TGCCCCAGTGAACATTCAACGCTGTGCGGTGAGTTTCAACGAAATTGAAAACCATCGACCGTTGATTGTACCCTGTGGCCAG                           | LG4:11780372-11780452      | + |
| cac-mir-181a-2 | GCTCACGGAGAACATTCAACGCTGTGCGGTGAGTTTGTGACTCTGACCAACCATCGACCGTTGCATGTACCCTGAGGGACG                            | LG9:10820887-10820966      | + |
| cac-mir-181a-3 | TGCCTCGGTGAACATTCAACGCTGTGCGGTGAGTTTGTGATATGGATCACATAAAAACCATCGACCGTTGACTGTGCCCGGGGCTTG                      | LG17:15578636-15578721     | + |
| cac-mir-181b-1 | GGTCACAATCAACATTCACTGTGCTGCGGTGGGTTGACTGTGTAGAAAAGCTCACTGAACAATGAGTGAACCTGTGGCCAGATCTGCCCGA                  | LG17:15578849-15578939     | + |
| cac-mir-181b-2 | GGCTGCAATAAACATTCACTGTGCTGCGGTGGGTTTACTTGAGAACAACCTCACTGATCAATGAATGCAGACTGCGGTTCA                            | LG9:10821192-10821270      | + |
| cac-mir-181b-3 | GGTCACAATTAACATTCACTGTGCTGCGGTGGGTTTAACTATGTAGAAAACTCGCTGAACGATGAATGCAACTGTGTCCC                             | LG4:11780572-11780651      | + |
| cac-mir-182-1  | TCTGGTGGTGTGGCAATGGTAGAACTCACACTGGTGAGGTAGATGGATCCGGTGGTCTAGACTTGCCAACTACTACCTGAG                            | LG23:4351801-4351884       | + |
| cac-mir-182-2  | GACGGCTGCACTCTCCCACAGTGTGGCAATGGTAGAACTCACTCTGGTGGGCTGGAAGGATCCGGTGGTCTAGACTTGCCAACTACTGACTGAGAGCTTTGACCTGCC | LG6:18739153-18739263      | + |

|                |                                                                                                        |                        |   |
|----------------|--------------------------------------------------------------------------------------------------------|------------------------|---|
| cac-mir-183-1  | TGTTCTGTGTATGGCACTGGTAGAATTCAGTGTGAGCGCTCACTATCAGTGAATTACCATAGGGCCATAAAACAGAGCAGAGAAAAGAACCCAC         | LG23:4350972-4351062   | + |
| cac-mir-183-2  | TGTTCTGTGTATGGCACTGGTAGAATTCAGTGTGACGGCACACAATCAGTGAATTACCATAGGGCCATAAAACAGAGTAGAGACTGAACCAC           | LG6:18738739-18738829  | + |
| cac-mir-184-1  | TTCTGTGGTTCGCTCACATCTCCTTATCACTTTTCCAGCCCAGCTATAGATTTTGTATCCGTTGGACGGAGAAGTATAAGGGCATGTGCAT            | LG3:37654036-37654126  | + |
| cac-mir-184-2  | TAATGTTGTGCGAGCACATCTCCTTATCACTTTTCCAGCCCAGCTATCTATTCAAATATGTGTTGGACGGAGAAGTATAAGGGTATGTGTCC           | LG6:23917881-23917971  | - |
| cac-mir-187-2  | CTGGGCCAGGGCTGCAACACAGGACATGGGTCCCGCTTGTCTCCCCGCTCGTGTCTTGTGTTGCAGCCAGTGGTCTCGC                        | LG11:10758791-10758870 | + |
| cac-mir-18a    | AGTCCTTGTGCTAAGGTGCATCTAGTGCAGATAGTGAAGTAGACTAGCACCTACTGCCCTAAGTGTCTCTTCTGGCATAA                       | LG21:17071379-17071457 | + |
| cac-mir-18b    | GTCTTTGTGCTAAGGTGCATCTAGTGCAGATAGTGAATAGACTAGCACCTACTGCCCTAAGTGTCTCTTCTGGCATAA                         | LG3:26485722-26485800  | + |
| cac-mir-18c    | GTCTCCAGCTAAGGTGCATCTAGTGTAGTTAGTGAATAATTCAGAATCTACTGCCCTAGTTGTCTCTTCTGGCTGGAGGGCTTGTGTGT              | LG10:4337230-4337320   | + |
| cac-mir-1905-1 | AACGATGTACGTGCAGGTTTGTCTGGATGCGTTTGTATGGTGGAGCCTTTAGGCCGACTACCAGCCCCACCACGGTATGGCACTCTCACCTGAAATGGT    | LG16:24403958-24404059 | - |
| cac-mir-1905-2 | CACGATGTAGGTGTGGGTCTGCTGCTGGATGCGCTTGTATGGTGGCCCTTTGGGACCTACAACGAGCCCCACCACACGGTAAGGCACCCGCACCTGGATGGT | LG3:5431636-5431737    | - |
| cac-mir-1905-3 | CACGATGTAGGTGTGAGTCTGCTGCTGGATGCGCTTGTATAGTCTGCTCCCTTTGGTCCAACAATAAACAACCT                             | LG17:14689748-14689820 | + |
| cac-mir-190a-1 | GGGCTCTGTCTGATATGTTTATATATTAGGTTGTTATTCAGTCCCAACTATATATCAAACATATTCCTACAGTGTCCCG                        | LG3:37443038-37443117  | + |
| cac-mir-190a-2 | GGGCTCTGTCTGATATGTTTATATATTAGGTTGTTATTCAGTCCCAACTATATATCAAACATATTCCTACAGTGTCCCG                        | LG6:24299041-24299118  | - |
| cac-mir-190b   | AGAAGCTGTGTGATATGTTTATATTCGGTGTCTTGTGCTTCATCGTGTCAAATAATATCAGACATATTCCTACAGAGTCTGGCAAAA                | LG16:21893141-21893231 | + |
| cac-mir-192    | ACACAAGGGGATGACCTATGAATTGACAGCCAGTGATCGTAACATTTGCCTGTACAGTTCTGTAGGCCACTGCTGTGTTGCCATCTGACTG            | LG14:9134974-9135064   | - |
| cac-mir-193a   | AGTTAGATGCTGGGTCTTTGCGGGCAAGGTGAGTCTCACTTCGTTCAAATGGCCTACAAAGTCCCAGTTTCTGGCT                           | LG1:24202776-24202852  | - |
| cac-mir-194a   | GCTCGCTGGATGTAACAGCAACTCCATGTGGAAGCTGTGAGTGTTCAGTGGAGGTGCTGTTACCTGCAGAG                                | LG14:9135142-9135213   | - |
| cac-mir-194b   | GCCTTGTCTGTGGGTCTCACCAGCTGTAACAGCATCTCCATATGGAACAATCTGGCTTCCAGTGGAGCTGCTGTTATCTGTGGTGGGACACCTCTTG      | LG10:23391190-23391287 | - |
| cac-mir-196a-1 | TCGAGTGGTTAGGTAGTTTCATGTTGTTGGGGTCCATTCTAACTCTGCAACATGAAACTGTCTTAATTGCCCCAG                            | LG11:19356718-19356794 | - |
| cac-mir-196a-2 | GAAGCGTGGTTAGGTAGTTTCATGTTGTTGGGGTGGCTTCTGGCTCGGCAACAAGAAACTGCCTTGATTACGTCAGTTCGCTTCATCAAGGGCACAAAT    | LG7:22062661-22062761  | + |
| cac-mir-196b   | CTGTGTGATGTAGGTAGTTCAAGTTGTTGGGCTGGATGTTAAGAACAACAGGAACCTGAACTGCCCTGAATCACACCGACCTCAACTGCACAGAGGAAA    | LG8:18332982-18333082  | - |
| cac-mir-196d   | TTGAGTGGTTAGGTAGTCTCATGTTGTTGGGCTTTTATATTTCTCCCAACAACAGAAACTGTCTTGATTACCACAGT                          | LG16:17946285-17946362 | - |
| cac-mir-199-1  | AGCCCGCTGCCAGTGTTCAGACTACCTGTTACAGGAAGTAGTGGTTGTACAGTAGTCTGCACATTGGTTAGGCTGGCCGG                       | LG12:11666948-11667028 | - |
| cac-mir-199-2  | CCCCCGCTGCCAGTGTTCAGACTACCTGTTACATCAGGTTACAGCTGACAGTAGTCTGCACATTGGTTAGGCTGGGCTG                        | LG8:19542342-19542422  | + |
| cac-mir-199-3a | GCTCCGTCTACCCAGTGTTCAGACTACCTGTTCACTGTCATACTGGTGTACAGTAGTCTGCACATTGGTTAGACTGGGCAT                      | LG17:6603714-6603794   | - |
| cac-mir-199-3b | GCTCCGTCTACCCAGTGTTCAGACTACCTGTTACAGGATCTTACTGGTGTACAGTAGTCTGCACATTGGTTAGACTGTGCAA                     | LG4:29844093-29844173  | + |

|                |                                                                                                |                                  |   |
|----------------|------------------------------------------------------------------------------------------------|----------------------------------|---|
| cac-mir-19a-1  | GTTCTCTGCTAGTTTTGCATAGTTGCACTACAAGAATAGATGAGTTGTG<br>CAAATCTATGCAAAACTGATGGTGGCCT              | LG3:26485865-<br>26485941        | + |
| cac-mir-19a-2  | GTTCTCTATTAGTTTTGCATAGTTGACTGCAAGAAGAATTGAGTTGTG<br>CAAATCTATGCAAAACTGATGGTGGCCT               | LG21:17071527-<br>17071603       | + |
| cac-mir-19b-1  | TCACTTGGTCAGTTTTGCTGGTTGCATCCAGCTTTTTCTGATGTTGCTG<br>GTGCAAATCCATGCAAAACTGACTAGGTTGA           | LG3:26486210-<br>26486290        | + |
| cac-mir-19b-2  | GTCTCTGGTTAGTTTTGCTGGTTGCTTTCAGCTTATCACTGTAAGTGTG<br>TGCAAATCCATGCAAAACTGATCATAGAAC            | LG21:17071813-<br>17071892       | + |
| cac-mir-19c    | GTTTACAGCCAGTTTTGTTGGTTTGTCTCAGCTGTTGCCAGTCTCTGCT<br>GTGCAAATCCATGCAAAAGTCTCTGTGTCTCA          | LG10:4338682-<br>4338763         | + |
| cac-mir-19d    | GATCCTGGCCAGCTTTGCAGGGTCGGCAGTCAGCCTGTGTAAGTGTG<br>GCCGCTGTGCAAACCCATGCAAAACTGACCATGGCCA       | LG10:28713961-<br>28714046       | - |
| cac-mir-200a   | TCTCAGGATCCATCTTACCTTACAGTGTGGATTGTAAGTGTGTTCT<br>AACACTGTCTGGTAACGATGTTTCTGGGT                | LG7:13021182-<br>13021261        | + |
| cac-mir-200b   | TGATTATCTCCATCTTACGAGGCAGCATTGGATACTCATCACTCTCTTA<br>ATACTGCCTGGTAATGATGATGATAGTCAT            | LG7:13020998-<br>13021077        | + |
| cac-mir-202    | CTGTTCTTTTTCTATGCATATACTCTTTTCAGATGTCACCTTAAAGAG<br>GCATAGGGCATGGGAAAATGGGGTGCAGAGGTTTCCGCC    | Ice_Fa_000412F<br>:424132-424222 | + |
| cac-mir-203b   | CCTCTGATTAAGTGGTTCTCAACAGTTCACAGTCTTTTACAAAATTG<br>TGAAATGTTTAGGACCATTGACCAGTCAGA              | LG22:16832204-<br>16832283       | + |
| cac-mir-204-1  | GCCCGTGGGCTTCCCTTTGTCATCTATGCCTGGAGCTCGGTTAAGGCA<br>GGGACAGCAAAGGGATGCTCAAATGTCACCAAAGACTTCACT | LG6:24937925-<br>24938015        | + |
| cac-mir-204-2  | ACCAGTGGGTTTCCCTTTGTCATCTATGCCTTGAGCTGTGTAAGGCAG<br>GGACAGCAAAGGGAGGCCAGCCGTCCTACTACCTTCACTTTA | Ice_Fa_002768F<br>:3032-3122     | + |
| cac-mir-204-3  | ACCTATGGACTTCCCTTTGTCATCTATGCCTGGACTCATAAAAAGGG<br>GCTGGGAAGGCAAAGGGACGGCCAGTCGTCACACAAGCGTCT  | LG9:36657568-<br>36657658        | + |
| cac-mir-205-1  | ATGTGTTCTATCTTCACTTCCACCGGAGTCTGTATCTGCATCCAACCA<br>ATTTCAGTGGTGTGAAGTGAAGAGACATGGGG           | LG7:38173290-<br>38173371        | + |
| cac-mir-205-2  | ATGTATTCTATCTTCACTTCCACCGGAGTCTGTGTAAGTGCCTCAATC<br>ATTTCTGTGGTTTGAAGAGTAAAACACATG             | LG5:12875409-<br>12875487        | - |
| cac-mir-206-1  | CTTGTGAGGACATGCTTCTTATATCGCCATATAATTCACCACTTATGG<br>AATGTAAGGAAGTGTGTGGTTCAATG                 | Ice_Fa_000312F<br>:265355-265431 | + |
| cac-mir-20a-1  | TCGGTAGTATTAAGTGTCTTATAGTGCAGGTAGTTGTATGCATTCTAC<br>TGCACTGTGAGCACTTGCAGTACTCTA                | LG21:17071688-<br>17071764       | + |
| cac-mir-20a-2  | TCAGCAGTGTAAAGTGTCTTATAGTGCAGGTAGTGTCTTCTCTATCT<br>ACTGCAATGTAAGCACTTAAAGTACTTCTAAC            | LG3:26486074-<br>26486154        | + |
| cac-mir-20b    | CTGGTAGTCCCAAAGTGTCTCACAGTGCAGGTAGTACTCACTGACCTACT<br>GCAGTTTGTGCACTTCAAGTGTGCGGTCACCTTCCCTCAC | LG10:4338559-<br>4338649         | + |
| cac-mir-210    | AAAAGCAGGTAAGCCACTGACTAACGCACATTGTGCCAGTTGACAATT<br>CCTACTGTGCGTGTGACAGCGGCTAACCTGGTTTT        | LG6:18152801-<br>18152882        | + |
| cac-mir-21-1   | GCCTGTGAGATAGCTTATCAGACTGGTGTGGCTGTTAACGTTGCAAGG<br>CGACAACAGTCTGTAGGCTGTCTGACATTT             | LG14:29216399-<br>29216478       | - |
| cac-mir-21-2   | CTGCGTCAGCTAGCTTATCAGACTGGTGTGGCTGTTATATTTAAAGG<br>CAACATTGGTTTGTAAAGTGGCTGAAGTCTG             | LG13:35444789-<br>35444868       | + |
| cac-mir-212-1  | GTGCATCAATACCTTGGCTCTAGACTGCTTACTGCTAAAACCTCTCAA<br>AGTACAGTAACAGTCTACAGTCATGGCTACTGACGT       | LG13:18746823-<br>18746907       | - |
| cac-mir-212b   | GAGCATCAGCACCTTGGCTTTAGACTGCTTACTGCTTATACAGCGTTGC<br>AGTACAGTAACAGTCTACAGTCATGGCTACTGAAGC      | LG14:22162343-<br>22162427       | + |
| cac-mir-214a   | GCAGTGTGCTGCCTATCTACACTGTGTGCAGAAATATCTCTCAACCT<br>GTACAGCAGGCACAGACAGGCAGATAGACA              | LG17:6602196-<br>6602274         | - |
| cac-mir-214b   | GTGATGTGCTGCCTGTCTACACTGTGTGCAGACCTTCTGCTCCTGTA<br>CAGCAGGCACAGACAGGCAGACAGATG                 | LG4:29846779-<br>29846855        | + |
| cac-mir-216a-1 | TGTTTTGGTGAAATCTCAGCTGGCAACTGTGAGTGTCTCACTAGCTGCT<br>CTCACAATGGCCTCTGGGATTATGCTAAAACGCAG       | LG15:20465579-<br>20465661       | + |

|                |                                                                                                                                |                                |   |
|----------------|--------------------------------------------------------------------------------------------------------------------------------|--------------------------------|---|
| cac-mir-216a-3 | TGGTCCAGTTAATCTCAGCTGGCAACTGTGAGCTTTGAACGCCTCACA<br>GAGCCGGCTAGGGTTCTCCTGAACGCAGCACCATCATTTCT                                  | LG1:36596133-<br>36596223      | - |
| cac-mir-216b-1 | GAGGACTGGGTAATCTCTGCAGGCAACTGTGATGGTGCTTATATTCTC<br>ACAATCACCTGGAGAGATTCTGCAGTTTAGTC                                           | LG15:20464861-<br>20464941     | + |
| cac-mir-216b-2 | GTCGCCTTGTAATCTCTGCAGGCAACTGTGATGTCACGTTTTCTCACA<br>ATCACCTGCAAAGATGATCCAGTCGCTCTGCTCAGACCAGCA                                 | LG1:36596298-<br>36596388      | - |
| cac-mir-217a   | ATGTGGATGATACTGCATCAGGAAGTATTGGCTGATGCTCAATAGCCA<br>ACAGAACCTGATGCATTGCCTTCAGCATCA                                             | LG15:20466090-<br>20466168     | + |
| cac-mir-217b   | ATGTTGAAGATACTGCATCAGGAAGTATTGGAGAGCGATGAGGCCAT<br>CAGCTCCTGATGCAATGCCTTCAGCATTAAGACACTTCCCC                                   | LG1:36594737-<br>36594827      | - |
| cac-mir-2184   | CTCAGCCCTGAACAGTAAGAGTTTATGTGCTGTTGTTAATCTGTCAGCA<br>CATGAGCTTTTACGGTGCAGGGAAGCAGACGACCAACATCTT                                | LG14:22164003-<br>22164093     | - |
| cac-mir-2187a  | GGAAGATCTGATTGATGATTCTGGCTTTAATTAGTATAGCCTGTTTTAG<br>TGATATCAGCAATTCTTACAGGCTATGCTAATCTGTGCCAGAATTAGC<br>AATGCAATTGGAACGGACGCA | LG15:25192894-<br>25193012     | - |
| cac-mir-2187b  | TGAGGAGATGTGATGGTTCTGGCTTTAATTAGTACAGCCTGTATTAGTA<br>ATGTCATCTATTCTTACAGGCTATGCTAATCTATGCCAGAACCAGCAA<br>TGCAATGGGAGACAGAAC    | LG19:1662919-<br>1663034       | + |
| cac-mir-2188   | TGGTGTGGGAAAGGTCCAACCTCACATGTCTGTGCGGCTGAAGGAAG<br>GCTGTGTGAGGTCAGACCTATCCCACACGGCT                                            | LG9:35226710-<br>35226789      | - |
| cac-mir-218a-1 | CAGCTGTCTCTGTGCTTATGCTAACCATGTGCCCCCGCTACTGTGGC<br>ATCACATGGTTCCGTCAAGCGCCAGGGACCGCCGAGCACACT                                  | LG10:29435375-<br>29435465     | + |
| cac-mir-218a-2 | GGTTGTTCTTTGTGCTTATGCTAACCATGTGGCTGCAAGGTTCTAAA<br>GTGGAACATGGTCCGTCAAGCACCATGGAACGGC                                          | LG1:21010467-<br>21010550      | + |
| cac-mir-218b   | CAGGACCCATTGTGCTTATGCTAACCATGCAGTGTATCTTCTGTCCAT<br>GTTCTGCCAAGCACCTTGAGGCTTGTGAGCACTCTCGGCA                                   | LG12:14063738-<br>14063828     | - |
| cac-mir-219-1  | CTCTAGCTGCTGATTGTCCAAACGCAATTCTTGTACATTTAATCCAAC<br>CCGAGAATTGTGCATGGACATCTGTTGCTTACGCTCGTGC                                   | LG9:3032198-<br>3032288        | - |
| cac-mir-219-2  | AGTCTGGCGTTGATTGTCCAAACGCAATTCTTGTGTTGATTCTCCATATC<br>CAGGAGTTGTGCATGGACATCTTGCTCAGACTCTCATTTA                                 | LG16:18536377-<br>18536467     | + |
| cac-mir-219-3  | CTTTAGCGACTGATTGTCCAAACGCAATTCTTGTAGTAAACTCAAATTCA<br>ACCCCAAGAATTGTGTATGGACATCTGTTGCTGCAGACTCAC                               | LG12:15027720-<br>15027810     | - |
| cac-mir-219-4  | GGTCCGGAGCTGATTGTCCAAACGCAATTCTTGCCTGCTGCTTTGTGAA<br>ACCAGGAGTTGTGCATGGACATCACGCCCTGACCTCTGAAA                                 | LG11:7309399-<br>7309489       | + |
| cac-mir-2196   | GTGCATGTGGGGTAGTTGCTGCGGATGTFCTCTCTGTGCTCCCCTTC<br>GGGACCGTCCCAAAGCGAAAAGGAGGATAATGCTCATGTGGTTTCTGG<br>AACTGTAGGAAGACA         | LG19:11335126-<br>11335237     | - |
| cac-mir-221a   | TTTGCTCTGAACCTGGCATAACAATGTAGATTTCTGTGTGGTTATTCTA<br>CAGCTACATTGTCTGTGGGTTTCTGGCTAGCA                                          | Ice Fa_003231F<br>:26032-26114 | - |
| cac-mir-221b   | TGAGGTTTGAACCTGGCATAACAATGTAGATTTCTGTGTGGTTATTCTA<br>CAGCTACATTGTCTGTGGGTTTCTGGCTAGCA                                          | LG2:6896178-<br>6896259        | - |
| cac-mir-222a   | TGCTGTCAGTTGCTCAGTAGGCAGTGTAGATCCTGTGTAGAAATCAGCA<br>GCTACATCTGGCTACTGGGTCTCTGACGGCTCTG                                        | Ice Fa_003231F<br>:26824-26906 | - |
| cac-mir-222c   | GCCCAGCAGTTGCTCAGTAGTCAGTGTAGATCCTGTGGGCTGGCAGC<br>AGCTACATCTGGCTACTGGGTCTCTGCTGGCATCC                                         | LG2:6896411-<br>6896493        | - |
| cac-mir-223    | CCCCACTTCGTGATTTGACAAGCTGAGTTTGACACTCTTGTTCGCTGA<br>GTGTCAGTTGTCAAATACCCCAAGTGAGGTGT                                           | LG14:6538352-<br>6538434       | - |
| cac-mir-22a-1  | GACCTACAGCAGTTCTTACTGGCAAGCTTATGTCTCATGTACCAGC<br>TAAAGCTGCCAGCTGAAGAACTGTTGTGGTCCGGC                                          | LG13:27228880-<br>27228962     | - |
| cac-mir-22a-2  | GACACACAGCAGTTCTTACTGGCAAGCTTATGTCTCATGTACCAGC<br>TAAAGCTGCCAGCTGAAGAACTGCTCTGGTCTG                                            | LG14:21486247-<br>21486328     | - |
| cac-mir-22b    | GCCTCACAGTCGTTCTTACTGGTAGCTTTATGTCCCACGCCCCACACT<br>AAAGCTGCCAGTTGAAGAGCTGTTGTGTGC                                             | LG9:34049271-<br>34049350      | + |
| cac-mir-23a-1  | GTGGTGGGGAGGGTCTTGGCACCGTGATTTGATGCACAAAGAGAAAAC<br>AAAAATCACATTGCCAGGGATTCCACTCCTTCACAG                                       | LG4:39604012-<br>39604096      | - |

|                 |                                                                                                                      |                            |   |
|-----------------|----------------------------------------------------------------------------------------------------------------------|----------------------------|---|
| cac-mir-23a-2   | GATGGCCAGGGGAATTCCTGGTGTAGAGTGATTTTGGAGACTACAGGACT<br>GAATCACATTGCCAGGGATTCCAATGGCTGACA                              | LG8:22605266-<br>22605347  | - |
| cac-mir-23a-3   | TTAGCTGGAGGGATTCCCTGGCAGAGTGATTGGTTGTGATGTCATGTAA<br>ATCACATTGCCAGGGATTCCAACCAGCTACA                                 | LG17:22723991-<br>22724071 | - |
| cac-mir-23a-4   | CCCAGTGTGTGTGGTGTGATGAAACAGAAAAAGAGTCTGGTGCATATG<br>GCAGCTATCTGGCTTAATTGCCAGGGATTCCATTCCCATCGC                       | LG2:6958299-<br>6958389    | - |
| cac-mir-23b-1   | GTGAGGGTCTCTGGCATGATGATTTGGGACAGAAAACGAAAATCACAT<br>TGCCAGGGATTACTACACTGCTG                                          | LG12:23509140-<br>23509210 | + |
| cac-mir-23b-2   | GAGACGGTCTTGTCTTTTCATGTCTGGGCTGTGAGGGTTCCTGGCGTGC<br>TGATTTGTGATTTATGATAAAATCACATTGCCAGGGATTACCACAACCC<br>TGA        | LG9:19563022-<br>19563122  | + |
| cac-mir-24-1    | GATTACTCCCAGGAAACATCTGGCCTCCCTCTGGTGCCTTCTGAGCTGA<br>GCGCAGTTAGATCTCCACACACTGGCTCAGTTCAGCAGGAACCGGAGT<br>CACG        | LG12:23510684-<br>23510784 | + |
| cac-mir-24-2    | TCAGTCTCTGTGCCTGCTGTGCTGATAATCAGTGTGTGATGTCGGCTG<br>GCTCAGTTCAGCAGGAACAGGAGACTGGT                                    | LG8:22603570-<br>22603647  | - |
| cac-mir-24-3    | TGGCTTCTGTGCCTACTGAACTGATTAACAGTCTACAGAACCCTGG<br>CTCAGTTCAGCAGGAACAGGAGTCCAG                                        | LG9:19569675-<br>19569750  | + |
| cac-mir-24-4a   | TACCTTCCCGTGCCTACTGAACTGGTATCAGTGTTTTACCAAAAAACT<br>GGCTCAGTTTACAGCAGGACCAGGAGTGAAGTCCACTTCAACCACATGT<br>GAC         | LG4:39600098-<br>39600198  | - |
| cac-mir-24-4b   | TGTAATCTGTGCCTACTGGACTGGATTGAGTGTGTCTCTGCAAAAAGT<br>GCTCAGTCCAGCAGGAACAAGAGTACT                                      | LG17:27201815-<br>27201891 | - |
| cac-mir-24-6    | CAATCTCTGTGCCTACTGAGCTGATAACAGTGTGATGTTAAACAACA<br>CTGGCTCAGTTCAGCAGGAACAGAGTTAGG                                    | LG17:22722005-<br>22722084 | - |
| cac-mir-25      | TGGTGTGAGAGGGCGGAGACTTGGGCAATTGCCGGCCATACCAGAGGG<br>CATTGCACTGTCTCGGTCTGACAGTGCCGGC                                  | LG10:28713761-<br>28713840 | - |
| cac-mir-26a-1a  | CTGGGTCTGTTCAAGTAATCCAGGATAGGCTTGTTAAAGTGGGGAAA<br>GCCTATACGGGATGACTTGGTTCAGAAACAAGG                                 | LG21:10818639-<br>10818719 | + |
| cac-mir-26a-1b  | CTGGGCCTGATTCAAGTAATCCAGGATAGGTTTGTTAGACAAGCAAA<br>GCCTATCCGATGACTTGATTGATTGAGGACGCTA                                | LG2:3487349-<br>3487429    | + |
| cac-mir-26a-2   | TGTGATCCAGTTCAAGTAATCCAGGATAGGCTGTGTGTATCCTGATTGG<br>CCTATTATGATTACTTGCACCTGGGTGGCAGC                                | LG17:9186821-<br>9186901   | + |
| cac-mir-26b     | CTCTGCCTGGTTCAAGTAATCCAGGATAGGCTGGTAACTCTGGCACGG<br>CCTATTCTGATTACCTGTTTTCAGGAACCTGGC                                | LG7:33407907-<br>33407987  | + |
| cac-mir-27a     | ATGGAGGGGCAGGACTTAGCTTGTCCGTGAACAGTGCAGTTGAAGCC<br>TGTGTTACAGTGGCTAAGTTCGGCTCCTCACAAG                                | LG17:22723484-<br>22723566 | - |
| cac-mir-27b     | CAGCCAGGCACAGAGCTTAGCTGATTGGTGAACAGTATTGATTTCCTC<br>TTTGTTCACAGTGGCTAAGTTCGACCTGAGG                                  | LG9:19563482-<br>19563563  | + |
| cac-mir-27c     | TTGCGGCAGCAGGACTTAGCCACATGTGAGCAGTGTGCTGCCAT<br>GTTACAGTGGTTAAGTTCGCGCCACAGGG                                        | LG8:22605049-<br>22605128  | - |
| cac-mir-27d     | CTGCTGTTTCTGATCAGGTGCAGAGCTTAGTCTGACTGCTGGACAGGGAG<br>TCTCAGCAATTTGTTACAGTGGCTAAGTTCCTCACTTGTGC                      | LG12:23509392-<br>23509482 | + |
| cac-mir-27e-1   | CTAAAGGCACAGAGCTTAGCTAATTGGTGTGAGCATTGATCCCTGCTATGT<br>GTTGTTACAGTGGCTAAGTTCAGTGCCTGAGGTG                            | LG4:39603464-<br>39603547  | - |
| cac-mir-27e-2b  | TTTCTGAAGATGCAGAACTTAGCTCATTAGTGTGAGCATTGAAACAAACA<br>AGAATTGTTACAGTGGCTAAGTTCAGTGTCTGACATG                          | LG17:27202143-<br>27202228 | - |
| cac-mir-2985-1a | GCTACGCCGAAAGGATCCTCATTAAGGTGGGTGGAATAGTATAACAAT<br>GTGTCCAATGTTGTTATAGTATCCACCTACCCTGATGTAGCTTTGCTTA<br>TTT         | LG10:30161300-<br>30161400 | + |
| cac-mir-2985-2b | AAGGCTCACAGTTAAGGTGGGTGGAATAGTGAACAATAGAAGACAGT<br>AACAAAGCTGATACTGTCTATTGCTGCAATATCCACCTACCCTGCTG<br>TGCTTTTATACTTC | LG13:29395312-<br>29395423 | - |
| cac-mir-2985a   | GCGACGCCCAAAGGCTCAGCATTAGGGTGGGTGGAATAATATAACAAT<br>ATCCTCCCTGTTGTTATAGTATTCCACCTACCCTGATGTCCCTTGTTC                 | LG10:11512999-<br>11513095 | - |
| cac-mir-2985b   | ACCTAAAGGCTCTGCATTAGGGTGGGTGGGATAATATAACAATATCCTC<br>CATGTTGTTATAGTATTCCACCTACCCTGATGTTTCTTTTGCCA                    | LG14:28054216-<br>28054309 | - |



|                  |                                                                                                   |                                  |   |
|------------------|---------------------------------------------------------------------------------------------------|----------------------------------|---|
| cac-mir-29a-1    | TCTCCAGGGAAGCTGGTTTCGGATGGTGTTCCTAGAGTGTAAACATATGATC<br>TAGCACCATTGAAATCGGTGTTCTTGAG              | LG5:13035688-<br>13035765        | + |
| cac-mir-29a-3a   | CCCTTGGAAGCTGGTTTCATGTGGTGGCTTAGAGTCTCATCATCTATCT<br>AGCACCATTGAAATCGGTGGTCTTGGG                  | LG7:38610704-<br>38610780        | - |
| cac-mir-29a-3b   | CTAAAAGATGACTGATTTCTCCTGGTGTTCAGAGCCCGCTGCAGCCTTC<br>TAGCACCATTAGAAATCGGTATAAAACTGTG              | LG23:19621638-<br>19621718       | + |
| cac-mir-29b-1a   | CCCCAGAAGCTGGTTTCCCATGGTGGATTAGATGTTCCATTGTCTAG<br>CACCATTGAAATCAGTGTCTTGGCGA                     | LG23:19621492-<br>19621568       | + |
| cac-mir-29b-1b-1 | CCCTTGGAAGCTGGTTTCATGTGGTGGCTTAGAGTCTCATCATATATCT<br>AGCACCATTGAAATCAGTGGTCTTGGGG                 | LG7:38604864-<br>38604942        | - |
| cac-mir-29b-1b-2 | CCCTTGGAAGCTGGTTTCATGTGGTGGCTTAGAGTCTCATCATATATCT<br>AGCACCATTGAAATCAGTGGTCTTGGGG                 | LG7:38608321-<br>38608399        | - |
| cac-mir-29b-2    | ACCAAGGCTGACCGTTTTTCGTCTGGTTCAGAGTTCATCATGTCTA<br>GCACCATTGAAATCGGTACAATGTA                       | LG5:13036020-<br>13036095        | + |
| cac-mir-29b-4    | CACTCAGAACTGATTTTCATTTGGTGACGTAGATGTTGTACCCAGTCT<br>CTAGCACCATATGAAATCAGAGTCTGGGAGGT              | LG6:28927436-<br>28927517        | - |
| cac-mir-301a     | GTTGGCAGGTGCTCTGACTTCATTCGACTACTGTATCAGACAGCTAGCA<br>GTGCAATAGTATTGTCAAAGCATCTGAAAAC              | LG14:5442428-<br>5442507         | - |
| cac-mir-301b     | GAGGTCAGCTGCTTTGACGATGTTGCACTACTGTACCATCCTAAAGCAG<br>TGCAATAGTATTGTCATAGCATCCGGCCTT               | LG9:1604473-<br>1604551          | - |
| cac-mir-301c     | AGAGTCAGCTGCTTTGACAATGTTGCACTACTGTACCATCCATTCTAGC<br>AGTGCAATAGTATTGTCATAGCATTGGCCTC              | LG12:14132784-<br>14132864       | - |
| cac-mir-30a      | AGTTTGGGGCTGTA AACATCCCCGACTGGAAGCTTTTATCCACAGAGC<br>TTTCAGTCCGATGTTTGCCGCTGCCGACTGC              | Ice_Fa_000685F<br>:92951-93030   | - |
| cac-mir-30bb     | ACTCAGTCCATGTA AACATCCTACACTCAGCTGTGAGAGGCTGAGGGA<br>AGGTTGTTACTTGGACTGGCTGGA                     | Ice_Fa_000685F<br>:92776-92848   | - |
| cac-mir-30c-1    | TTATAGGCAGTGTA AACATCCTACACTCTCGGTGTCTCCCCCTGGTGGC<br>CGGGAGGGGGTATGTTTATTCTGCCTGGCTCAGGAACCTCAAC | LG15:7695779-<br>7695869         | + |
| cac-mir-30c-2    | TCTCCAGGCATGTA AACATCCTACACTCTCAGCTGTGTTATCATGGAGC<br>TGGGAGAAGGGTGTACCCTCTGGTGATA                | LG11:11863439-<br>11863518       | + |
| cac-mir-30e-1    | AGGTGCTGTA AACATCCTTGACTGGAAGCTGGGGTTAGACAGCGTGAG<br>CTTTCAGTCGGATGTTTGAGCATCTTATTG               | LG11:11863113-<br>11863191       | + |
| cac-mir-30e-2    | GGCTACTGTA AACATCCTTGACTGGAAGCTGGTGTGTTGTTCTTGGGCT<br>TTCAGTCGGATGTTTGACAGCAGCCAACCTG             | LG15:7691932-<br>7692009         | + |
| cac-mir-31       | CCAGGAAGGAAGGAAGATGTTGGCAGATGATGAAGTTAAAACCT<br>GCTATGCCACCACATTGCCATCTTCTCCCCCTCTGCAGCAA         | LG18:7892411-<br>7892501         | - |
| cac-mir-338-1a   | TGCTTCCTGGAACAATATCCTGGTGTGCTGCTGAGTGATCCTCACAGACT<br>CCAGCATCAGTGATTTGTTGCAGGTGGT                | LG19:5395655-<br>5395732         | - |
| cac-mir-338-1b   | CTCTCCCTGCAACAACATCCTGGTGTGCTGCTGAGTAATTGTCACAACT<br>CCAGCATCAGTGATTTGTTGCCGGGGG                  | LG8:20402927-<br>20403004        | - |
| cac-mir-338-2    | GCCTCCTGGGAACAGCATCCTGATGCTGTGAGGGTGTGTAAGCAGAA<br>CTCCAGCATCAGTGATTTGTTGCCAGGGGG                 | LG19:22095349-<br>22095427       | + |
| cac-mir-33a-1    | GGTGGCTGTGGTGCATTGTAGTTGCATTGCATGGTCTGATGACGAGTG<br>CAATGTGTCTGCAGTGCAACACAGAGGCCTC               | LG8:27616571-<br>27616650        | - |
| cac-mir-33a-2    | CAGAGCTGTGGTGCATTGTAGTTGCATTGCATGTTGGGTAACCTCCGTGC<br>AATGGATCTGCTCTGCAACACAGAACT                 | LG19:22527441-<br>22527516       | - |
| cac-mir-33b      | CAGAGCTGTGTGCAATTGTAGTTGCATTGCATGTGTGTCTCAGCGGAGT<br>GCAATGTTCTCTGCAGTGCAACACAGAGCTGGC            | LG8:18223309-<br>18223389        | + |
| cac-mir-34a      | GGTGTTCCTCTGGCAGTGTCTTAGCTGGTGTGTGAGGAGTGAAAACG<br>AAGCAATCAGCAAGTATACTGCCGCAGAAAACCTTC           | Ice_Fa_000343F<br>:226310-226394 | + |
| cac-mir-3618     | AATGCATTGTTGATTTCCAATAATTGAGACAGTGATTCTGAAAGCTGTC<br>TACATTAATGAAAAGAACAATGTAGACAGCT              | LG9:41067940-<br>41068019        | + |

|               |                                                                                                               |                                  |   |
|---------------|---------------------------------------------------------------------------------------------------------------|----------------------------------|---|
| cac-mir-363   | TGACATTGCTGCTTGCTCGCTGTTTTCCGGGTGGATGACTTCACAATTC<br>AATACTCGAAAAATTAGAAATTGCACAGTATCCATCTGCAAGCCGCC<br>AGA   | LG10:4338916-<br>4339016         | + |
| cac-mir-365   | GGGAGAGAGAAAAAGGCAGCAAGAAAAGTGAGGACTTTTAAGGGCAG<br>CTGTGTTTTATTAAACCCAGTCATAATGCCCTAAAAATCCTTATTGCTCT<br>TGCA | LG1:24200163-<br>24200263        | - |
| cac-mir-375   | GTATTTGCTTCACGTTGAGCCTCACGTACAATACCTGAAGATTAAGTTT<br>TGTTTCGTTCCGGCTCGGTTACGCAGGTACG                          | LG21:12224058-<br>12224136       | + |
| cac-mir-429   | TCCTTCCAGCCTGTTGATAGGCGTCTTACCAGACATGGTTAGATGTAAT<br>TATTGGTGTCTAATACTGTCTGGTAATGCCGTCATTAAATG                | LG7:13022488-<br>13022578        | + |
| cac-mir-449   | ATGCTCATATTGTGGGTGGTTGGTAGGCAGTGTCTTGTAGCTGGTTG<br>TTCTTTGCGTGCCAGTTACCTGCTGCTGCCCTCCAACCTTCCATTCAA<br>CCAC   | LG9:17977903-<br>17978006        | + |
| cac-mir-451   | GGGGGCCGTCAAACCGTTACCATTACTGAGTTTCAGTTAGGGTAAGGGT<br>TATACGGCCCTCGC                                           | LG14:11099605-<br>11099667       | - |
| cac-mir-454b  | ACGCACCCCTATGTTGCCTCTGCTTTCAATAGAGTCAACAGAGTAGTGC<br>AATATGGCTTAGGGTCTTGACTCTGAGGGGTGGTCTCT                   | LG9:1599902-<br>1599988          | - |
| cac-mir-455a  | GATGTGAGGGTATGTGCCCTTGACTACATCGTGAACCCAGCACCAT<br>GCAGTCCATGGGCATATACACTTTCCTCAAGG                            | LG9:14598393-<br>14598472        | - |
| cac-mir-455b  | GGCGTGAGGGTATGTGCCCTTGACTACATCGTGAAGCCAGCACCAT<br>GCAGTCCATGGGCATATACACTTGCCTCATGG                            | LG12:1228182-<br>1228261         | + |
| cac-mir-456   | AGGCAGCTGTGGCTCTGTGAGCAGGCATCTCCAGCCTACATGTAGA<br>TCCAGGAATCTGCAGGCTGGTTAGATGGTTGTCACATGTCTG                  | LG15:1466389-<br>1466479         | + |
| cac-mir-458   | TGCAGACGGCAGCGCCATTTTCAGAGCTATCAGTGTGAAAGTGATCAT<br>AGCTCTTTAAATGGTACTGCTGTCGGTAT                             | LG10:37571761-<br>37571837       | + |
| cac-mir-459   | CGTGTCGCTGTCAGTAACAAGGATTCATCCTGTTGTGACTCTGCA                                                                 | LG2:5672106-<br>5672150          | - |
| cac-mir-460-1 | CTTACAGTTCCTGCATTGTACACACTGTGCGTATAAGTGACTTAAGCA<br>CAGCGCATACAATGTGGATGCTGTGCTA                              | LG17:21784965-<br>21785041       | - |
| cac-mir-462   | GGTGGGATTGTAACGGAACCCATAATGCAGCTGTAATTCTGAGCTCCA<br>GCTGGTTATAGGCTCCGTTTCCATCCCATGATG                         | LG7:15851978-<br>15852058        | - |
| cac-mir-489   | GGTGGCCTGGTGGTCTGATGTATGACGTCATTTACTTCAGTGTGGAG<br>TGACATCATATGTACGGCTGCTAAACTGCTAC                           | LG11:18260879-<br>18260959       | - |
| cac-mir-499   | ACGGAGGCAGTTAAGACTTGCAGTGATGTTAGGGCAATGATCACATG<br>AACATCACTTAAAGTCTGTGCTCTCTCTC                              | LG5:35637055-<br>35637133        | - |
| cac-mir-551   | TGCCTCCACAGATACATTCTGCCTGCCCTTAGAAACCAAGTGTGGGTGT<br>GGCCGGGTTAAACACACAATGGCGACCCATCCTTAGTTTCTGAGGTCCT<br>GCA | LG13:36890714-<br>36890814       | - |
| cac-mir-7132  | TTTGCCCTGGACTTGGTCAAAGCTCCTCAGCAGAATAAGAGACTCTGA<br>GGCGTTTAGAACAAAGTGCAGGGTCTCGGA                            | LG1:25135918-<br>25135995        | - |
| cac-mir-7133  | AAATGGCTCAGATGTTGAGTATCAAAGTGTATGTTGATACGTCATATA<br>TAGTTTGATACACAGCACATAAGCCATTCC                            | LG7:7476438-<br>7476518          | + |
| cac-mir-7147  | TGCCAGTGCTGTACCATGCTGGTAGCCAGTGTGTGGTCCGGCTTTGCTG<br>GTGACCAGTGTGTGCCCTACTGGCTGCTCAGTGGAGAGCCC                | LG20:14488165-<br>14488255       | + |
| cac-mir-722a  | GACTGGAACAGAGTGAATTTGAAACGTTTTAGCCAAAAATGTTCCAT<br>GGTCAAGGTGTTTTTTCAGAAACGTTTCAGATTTTCGTTTTG                 | LG1:13532886-<br>13532976        | + |
| cac-mir-722b  | GACTGGAACAGAGTGAATTTGAAACGTTTTTCGCCAAAAATGTTTCAAT<br>GGTCAAGGTGTTTTTTCAGAAACGTTTCAGATTTTCGCTCCG               | LG8:19731018-<br>19731108        | + |
| cac-mir-723a  | GCTGGTCTATAAAGGCATGGATAAAGGCAGTTTGTATGATGTTACTTCT<br>TTTATTTTAAAGAAGACATCAGATAAATCTGTGCTTATCTTT               | Ice_Fa_000509F<br>:337262-337352 | + |
| cac-mir-723b  | CCCATATACTACGGCAAGGATAACGGCAGCTTTGTATGATGTTACTTCT<br>GACATATCGGAGAAGACATCAGATAAATCTGTGCTTATCCTT               | LG8:7011400-<br>7011490          | - |
| cac-mir-724a  | AGACTGGATTTAAAGGGAATTTGCGACTGTTAGTCAAAACATTAGAAC<br>AGCCACACCTTCTTTAAGATCTTGCTGCTG                            | LG5:31878431-<br>31878511        | - |
| cac-mir-724b  | AGACTGGGTTTAAAGGGAATTTGCGACTGTTAATCAAACCTTTTCAACA<br>GCCACACCTTCTTTAAGATCTTGCTGCTG                            | LG7:3006957-<br>3007037          | + |

|               |                                                                                                                      |                                  |   |
|---------------|----------------------------------------------------------------------------------------------------------------------|----------------------------------|---|
| cac-mir-725-1 | TTATCCGCACAGCTGGAACTTTGCCTGGGTATTATGTGCTTAAAATT<br>TCAGTCATTGTTTCTGGTCGTGTGTGTAAG                                    | LG4:27912239-<br>27912317        | - |
| cac-mir-726   | TGTTTCGAGGGTAGGTCTGGAATCCGCTAGTCTGAACTATTCATGGT<br>TGGTAAAAGTTCTCTACTAGCAGAACTCGGATTTGCTCCCGACTAGCGA<br>CGG          | LG5:35909231-<br>35909331        | - |
| cac-mir-727a  | TTTCAGTCTTCAGTTCCTCCCAGCCATAACTATGGCAGAAGTGTGTTG<br>AGGCGAGTTGAATACTTAAAGCGCTGCA                                     | LG20:11563739-<br>11563815       | + |
| cac-mir-727b  | ACTGAATGTCTGTATGTCATTTTCAGTCTTCAATTCCTCCCAGCCGTT<br>ACTATGGAACTGTGAGTTGAGGCGAGTTGAAGACTAAAAATGCTGTA<br>CAGATACAAGGAA | LG17:7384846-<br>7384956         | + |
| cac-mir-728a  | GCCCTGGGGAAATGTAGTTGACTTAAAGTATACGTGTGGAACCAGAGA<br>GTATACTAAGTACACTACGTTTAT                                         | LG20:11565444-<br>11565515       | + |
| cac-mir-728b  | TTTTGCGCTCATGAGAAAATGTAGTAGACTATAAGTATACCTGAACATG<br>TACGTATACTAAGTATACTACGTTTACTCAAGAGTGGCGTCTTC                    | LG17:7390537-<br>7390629         | + |
| cac-mir-730   | TGTTTCAGGCTCCTCATTGTGCATGCTGTGTGATTTCTGTGAGTACCAC<br>ACAGCGCCTGCAATGTGGAGGCTGAGACACGCAGAGACGCCTCACACA<br>CAC         | LG18:14296988-<br>14297088       | - |
| cac-mir-731   | GCTTTTCTCAATGACACGTTTTCTCCCGATTGCTGAGAACAGGAAAC<br>GCAACCGGGAATTTCTGTGCAGCAAAGAATGACA                                | LG7:15851506-<br>15851588        | - |
| cac-mir-734   | CCTCACCGCGCTGCCTTTGATTTCAAGAGCTGAACTATTCTGCAACATT<br>TGTTGATGTGGTCTGCAAGTAAATGCTGCAGAATTGTGCTCCTCTTGG<br>AAT         | LG21:14805856-<br>14805956       | + |
| cac-mir-736   | GCAGATCAGCTTTTTGTTTGTGTTATGTTCTACTAAAAATGTAAGACGA<br>ACAAAAAGTGTGCTGTTAGAT                                           | LG17:12203394-<br>12203464       | - |
| cac-mir-737   | CTCCTCTGTTGTTTTTTAGGTTTTGATTTTTGTAAGCGCTAAATGAGAA<br>AATCAAAACCTAAAAGAAAGTCCAGCGCTGAC                                | Ice_Fa_004695F<br>:7602-7682     | - |
| cac-mir-7552a | TCTCTTTCTTTACAATTAAGGATATTTCTCGTGAAACATCGACACAG<br>AAATGTATTTAATTTGTTGGATAAGTTTAGTCCGGCTCACG                         | Ice_Fa_001027F<br>:25872-25962   | + |
| cac-mir-7552b | AGGCATAATCTTACAATTAAGGATATTTCTCGTGACTGCAATAAAAAAC<br>GGAAATATCTCTTAATTTGCTTGGTTACGTCTGTCAGAGGCAC                     | LG15:25894555-<br>25894645       | + |
| cac-mir-7a-1  | TTACGCGTGTGGAAGACTAGTGATTTGTTGTTGTACATTTTCGTTTCAT<br>GACAACAAGTCCAGTCTCCCTCAGCGAGTCACGCCACCAC                        | LG6:6287604-<br>6287694          | + |
| cac-mir-7a-3  | TGGTGTGAGTGAAGACTAGTGATTTGTTGTTGTGATGCTGATCAATGAA<br>CAACAAGTCCAGTCTCCCTCAGCACAAGCAGAGCTCTTC                         | LG17:14995766-<br>14995856       | + |
| cac-mir-7a-4  | CATAGCAGCATGGAAGACTAGTGATTTGTTGTTTGTGATTAAGCTGA<br>CAACAAGTCATTGTCTCTCTACTGCTT                                       | LG16:24839300-<br>24839376       | - |
| cac-mir-7bb   | TGCTGCTGTGTGGAAGACTAGTGATTTGTTGTTTTAGTTAGATCAACC<br>AACAAACAATCACAGTCTGCCAAATAGCACGGGCTCCTCCT                        | LG9:24299842-<br>24299932        | - |
| cac-mir-8159  | GCCCCAGGCTCAGTAACTGGAATCTGTCCCTGCAGAGTGAAAGAGTG<br>CAGGGCCTGGCTGTTACTGCTCCCAGGGGCCAGGCTACTCTCCAAG<br>GGGCC           | LG14:24804996-<br>24805096       | - |
| cac-mir-9-1   | TTGTCTGTTATCTTTGGTTATCTAGCTGTATGAGTGTGACATTTTCA<br>TAAAGCTAGATAACCGAAAGTAAACAAGAATC                                  | Ice_Fa_000667F<br>:118856-118936 | - |
| cac-mir-9-2   | TAGGTTGTTATCTTTGGTTATCTAGCTGTATGAGTGTCTGCTCGTCATA<br>AAGCTAGATAACCGAAAGTAAAACTACT                                    | LG9:31822425-<br>31822503        | + |
| cac-mir-92a-1 | CTTCTGTGCAGGTTGGGAGAGGAAGCAATGCTCTGTACTTGTGTGGTA<br>TTGCACTTGTCCCGCCTGTTGAGGACATG                                    | LG21:17071919-<br>17071997       | + |
| cac-mir-92a-2 | CTTCCTGTGCAGGTGGGGATTTGTAGCAATGCTGAGTACCTGGAGGTAT<br>TGCACCTGTCCCGCCTGTATAGGAACGA                                    | LG3:26486378-<br>26486455        | + |
| cac-mir-93    | GCTGGGTGTCAAAAAGTGTGTTTGTGCAGGTAGCAGTCATCCACCTACT<br>GCAAAAACAGCACTTCAGGCACACGGTTC                                   | LG10:28714207-<br>28714284       | - |
| cac-mir-9-3   | TTGGTTGTTATCTTTGGTTATCTAGCTGTATGAGTGTGATGACATTCTCA<br>TAAAGCTAGATAACCGAAAGTAAACAAGAATC                               | LG16:37207042-<br>37207122       | - |
| cac-mir-9-4   | TTAGTTTTCTCTTTGGTTATCTAGCTGTATGAGTTATGTAATATCATAA<br>AGCTAGAGAACCGAATGTACAACTAATT                                    | LG4:31266933-<br>31267011        | + |
| cac-mir-9-5   | CCTGTTACTATCTTTGGTTATCTAGCTGTATGAGTGTAAACCTCCATCA<br>TAAAGCTAGATAACCGAAAGTAGGAATGACC                                 | Ice_Fa_000223F<br>:455562-455642 | + |

|              |                                                                                                 |                            |   |
|--------------|-------------------------------------------------------------------------------------------------|----------------------------|---|
| cac-mir-9-6  | TCTGTTTCTGTCTTTGGTTATCTAGCTGTATGAGTTTTAAATACAGCATA<br>AAGCTAGATAACCGAAAAGTAGAAACGACT            | LG6:15993720-<br>15993798  | + |
| cac-mir-96-1 | CTTTGCCCATTTTGGCACTAGCACATTTTGTCTTCTGTATATATACTTTG<br>AGCAATCATGTGTAGTGCCAATATAGGACAAGACAGACTTC | LG23:4351232-<br>4351322   | + |
| cac-mir-96-2 | CTTTGCCCATTTTGGCACTAGCACATTTTGTCTTGTCTTTTCGTTTGA<br>GCAATCATGTGTGGTGCCAATATAGGACAAGATAGGCAAT    | LG6:18738868-<br>18738958  | + |
| cac-mir-9-7  | TTAGTTTGTATCTTTGGTTATCTAGCTGTATGAGTTTTAATTCATAAAG<br>CTAGAGAACCGAAAGTACGAACTGACG                | LG17:15341992-<br>15342068 | + |
| cac-mir-99-2 | ATTTGGCACAACCCGTAGATCCGATCTTGTGGCGAATCTGACAGCACA<br>AGCTCGCCTCTGTGGGTCTTTGTCATCGT               | LG14:5184288-<br>5184365   | + |

**Supplementary Table 7. Statistics for the analysis of icefish repetitive elements.**

|                             | Repeats                        | Number            | Length occupied   | Percentage genome (%) |
|-----------------------------|--------------------------------|-------------------|-------------------|-----------------------|
| <b>LTR retrotransposon</b>  | LTR                            | 1,512             | 154,453           | 0.01                  |
|                             | LTR/Copia                      | 1,423             | 1,254,557         | 0.12                  |
|                             | LTR/DIRS                       | 28,935            | 21,963,956        | 2.06                  |
|                             | LTR/ERV1                       | 14,347            | 9,558,534         | 0.90                  |
|                             | LTR/ERVK                       | 953               | 147,808           | 0.01                  |
|                             | LTR/Gypsy                      | 54,611            | 21,218,816        | 1.99                  |
|                             | LTR/Ngaro                      | 3,291             | 1,806,225         | 0.17                  |
|                             | LTR/Pao                        | 6,780             | 3,393,081         | 0.32                  |
|                             | <b>Total</b>                   | <b>111,852</b>    | <b>59,497,430</b> | <b>5.58</b>           |
|                             | <b>non-LTR retrotransposon</b> | SINE              | 15,410            | 2,555,151             |
| SINE/5S                     |                                | 1,996             | 186,954           | 0.02                  |
| SINE/ID                     |                                | 563               | 47,443            | 0.00                  |
| SINE/MIR                    |                                | 19,288            | 3,038,263         | 0.29                  |
| SINE/tRNA                   |                                | 570               | 206,591           | 0.02                  |
| <b>Total</b>                | <b>37,827</b>                  | <b>6,034,402</b>  | <b>0.57</b>       |                       |
| <b>Transposable element</b> | LINE                           | 10,421            | 5,399,187         | 0.51                  |
|                             | LINE/CR1                       | 3,384             | 1,119,014         | 0.11                  |
|                             | LINE/I                         | 8,488             | 2,563,237         | 0.24                  |
|                             | LINE/Jockey                    | 5,508             | 1,365,271         | 0.13                  |
|                             | LINE/L1                        | 8,227             | 3,347,285         | 0.31                  |
|                             | LINE/L2                        | 100,525           | 40,927,414        | 3.84                  |
|                             | LINE/Penelope                  | 1,301             | 284,035           | 0.03                  |
|                             | LINE/Proto2                    | 2,374             | 780,797           | 0.07                  |
|                             | LINE/Rex                       | 72,096            | 16,705,191        | 1.57                  |
|                             | LINE/RTE                       | 8,466             | 4,759,124         | 0.45                  |
| <b>Total</b>                | <b>220,790</b>                 | <b>77,250,555</b> | <b>7.25</b>       |                       |
| <b>DNA transposon</b>       | DNA                            | 116,939           | 25,573,600        | 2.40                  |
|                             | DNA/Academ                     | 3,694             | 896,244           | 0.08                  |
|                             | DNA/CMC                        | 13,082            | 3,359,603         | 0.32                  |
|                             | DNA/Crypton                    | 9,700             | 2,343,498         | 0.22                  |
|                             | DNA/Ginger                     | 601               | 194,239           | 0.02                  |
|                             | DNA/Harbinger                  | 2,760             | 1,440,879         | 0.14                  |
|                             | DNA/hAT                        | 332,737           | 93,810,547        | 8.80                  |
|                             | DNA/Kolobok                    | 8,025             | 2,297,447         | 0.22                  |
|                             | DNA/Maverick                   | 10,958            | 3,101,964         | 0.29                  |
|                             | DNA/Merlin                     | 291               | 111,556           | 0.01                  |
|                             | DNA/MULE                       | 250               | 19,659            | 0.00                  |
|                             | DNA/Novosib                    | 2,194             | 641,603           | 0.06                  |
|                             | DNA/P                          | 4,543             | 2,087,502         | 0.20                  |
|                             | DNA/PIF                        | 32,016            | 12,688,102        | 1.19                  |
|                             | DNA/PiggyBac                   | 7,135             | 2,199,829         | 0.21                  |
|                             | DNA/Sola                       | 484               | 201,769           | 0.02                  |
|                             | DNA/TcMar                      | 15,385            | 7,248,703         | 0.68                  |
|                             | DNA/Zisupton                   | 889               | 198,058           | 0.02                  |
|                             | RC_Helitron                    | 2,519             | 2,163,670         | 0.20                  |

|                           |                       |                  |                    |              |
|---------------------------|-----------------------|------------------|--------------------|--------------|
|                           | <b>Total</b>          | <b>564,202</b>   | <b>160,578,472</b> | <b>15.07</b> |
|                           | <b>Unclassified</b>   | 628,836          | 201,836,786        | 18.94        |
| <b>Total Interspersed</b> |                       | <b>1,563,507</b> | <b>505,197,645</b> | <b>47.41</b> |
|                           | <b>Small RNA</b>      | <b>1,074</b>     | <b>454,551</b>     | <b>0.04</b>  |
|                           | <b>Satellites</b>     | <b>5,834</b>     | <b>2,808,492</b>   | <b>0.26</b>  |
|                           | <b>Simple repeats</b> | <b>324,248</b>   | <b>26,602,004</b>  | <b>2.50</b>  |
|                           | <b>Low complexity</b> | <b>26,275</b>    | <b>1,647,308</b>   | <b>0.15</b>  |
| <b>Total</b>              |                       |                  | <b>536,710,000</b> | <b>50.36</b> |

**Supplementary Table 8. Genome assemblies/Gene models used in this study.**

| Common name       | Species                          | Assembly/Gene model    |
|-------------------|----------------------------------|------------------------|
| Icefish           | <i>Chaenocephalus aceratus</i>   | This study             |
| Dragonfish        | <i>Parachaenichthys charcoti</i> | PRJNA330735            |
| Bullhead notothen | <i>Notothenia coriiceps</i>      | GCA_000735185.1        |
| Stickleback       | <i>Gasterosteus aculeatus</i>    | BROAD S1               |
| Platyfish         | <i>Xiphophorus maculatus</i>     | Xipmac4.4.2            |
| Amazon molly      | <i>Poecilia formosa</i>          | Poecilia_formosa-5.1.2 |
| Medaka            | <i>Oryzias latipes</i>           | HdrR                   |
| Tilapia           | <i>Oreochromis niloticus</i>     | Orenil1.0              |
| Takifugu          | <i>Takifugu rubripes</i>         | FUGU 5.0               |
| Tetraodon         | <i>Tetraodon nigroviridis</i>    | TETRAODON 8.0          |
| Cod               | <i>Gadus morhua</i>              | gadMor1                |
| Zebrafish         | <i>Danio rerio</i>               | GRCz10                 |
| Cavefish          | <i>Astyanax mexicanus</i>        | AstMex102              |

**Supplementary Table 9. Summary of orthologous gene clusters analyzed in 13 species\*.**

| Species name      | No. of coding genes | No. of gene families | No. of genes in gene families | No. of orphan genes | No. of unique gene families | Ave. No. of genes in gene families |
|-------------------|---------------------|----------------------|-------------------------------|---------------------|-----------------------------|------------------------------------|
| Icefish           | 30,773              | 18,636               | 24,159                        | 6,614               | 581                         | 1.3                                |
| Dragonfish        | 32,713              | 21,417               | 26,550                        | 6,163               | 429                         | 1.2                                |
| Bullhead notothen | 32,635              | 20,153               | 23,387                        | 9,248               | 34                          | 1.2                                |
| Stickleback       | 20,786              | 16,131               | 19,601                        | 1,185               | 48                          | 1.2                                |
| Platyfish         | 20,379              | 16,966               | 19,748                        | 631                 | 6                           | 1.2                                |
| Amazon molly      | 23,615              | 18,019               | 22,488                        | 1,127               | 116                         | 1.2                                |
| Medaka            | 19,699              | 14,981               | 18,136                        | 1,563               | 132                         | 1.2                                |
| Tilapia           | 21,437              | 16,282               | 20,541                        | 896                 | 139                         | 1.3                                |
| Takifugu          | 18,523              | 14,767               | 17,747                        | 776                 | 47                          | 1.2                                |
| Tetraodon         | 19,602              | 14,835               | 17,783                        | 1,819               | 47                          | 1.2                                |
| Cod               | 20,094              | 15,292               | 18,107                        | 1,987               | 72                          | 1.2                                |
| Zebrafish         | 25,397              | 16,334               | 22,815                        | 2,582               | 320                         | 1.4                                |
| Cavefish          | 23,042              | 16,014               | 19,522                        | 3,520               | 124                         | 1.2                                |

\* Species list are Supplementary Table 8.



**Supplementary Table 10. Gene Ontology of expanded genes families in the icefish genome relative to the 13 species\*.**

| Category | GO_acc     | Term                                                                                                                      | p-value  |
|----------|------------|---------------------------------------------------------------------------------------------------------------------------|----------|
| P        | GO:0043623 | cellular protein complex assembly                                                                                         | 6.40E-07 |
| P        | GO:0050906 | detection of stimulus involved in sensory perception                                                                      | 2.00E-06 |
| P        | GO:0034622 | cellular macromolecular complex assembly                                                                                  | 2.20E-05 |
| P        | GO:0007606 | sensory perception of chemical stimulus                                                                                   | 3.00E-05 |
| P        | GO:0007600 | sensory perception                                                                                                        | 2.90E-05 |
| P        | GO:0006461 | protein complex assembly                                                                                                  | 4.80E-05 |
| P        | GO:0065003 | macromolecular complex assembly                                                                                           | 0.00023  |
| P        | GO:0071205 | protein localization to juxtaparanode region of axon                                                                      | 0.029    |
| P        | GO:0007626 | locomotory behavior                                                                                                       | 0.0092   |
| P        | GO:0034728 | nucleosome organization                                                                                                   | 0.04     |
| P        | GO:0032507 | maintenance of protein location in cell                                                                                   | 0.04     |
| P        | GO:0042742 | defense response to bacterium                                                                                             | 0.027    |
| P        | GO:0065004 | protein-DNA complex assembly                                                                                              | 0.013    |
| P        | GO:0000050 | urea cycle                                                                                                                | 0.004    |
| P        | GO:0019627 | urea metabolic process                                                                                                    | 0.004    |
| P        | GO:0071466 | cellular response to xenobiotic stimulus                                                                                  | 0.0031   |
| P        | GO:0002460 | adaptive immune response based on somatic recombination of immune receptors built from immunoglobulin superfamily domains | 0.028    |
| P        | GO:0035113 | embryonic appendage morphogenesis                                                                                         | 0.044    |
| P        | GO:0045185 | maintenance of protein location                                                                                           | 0.04     |
| P        | GO:0006935 | chemotaxis                                                                                                                | 0.024    |
| P        | GO:0043604 | amide biosynthetic process                                                                                                | 0.017    |
| P        | GO:0002449 | lymphocyte mediated immunity                                                                                              | 0.0048   |
| F        | GO:0019001 | guanyl nucleotide binding                                                                                                 | 9.30E-07 |
| F        | GO:0004984 | olfactory receptor activity                                                                                               | 1.80E-06 |
| F        | GO:0017111 | nucleoside-triphosphatase activity                                                                                        | 0.001    |
| F        | GO:0004053 | arginase activity                                                                                                         | 0.0011   |
| F        | GO:0004190 | aspartic-type endopeptidase activity                                                                                      | 0.0014   |
| F        | GO:0070001 | aspartic-type peptidase activity                                                                                          | 0.0014   |
| F        | GO:0016818 | hydrolase activity, acting on acid anhydrides, in phosphorus-containing anhydrides                                        | 0.0019   |
| F        | GO:0016462 | pyrophosphatase activity                                                                                                  | 0.0018   |
| F        | GO:0005506 | iron ion binding                                                                                                          | 0.002    |
| F        | GO:0005093 | Rab GDP-dissociation inhibitor activity                                                                                   | 0.004    |

|   |            |                                                                                           |        |
|---|------------|-------------------------------------------------------------------------------------------|--------|
| F | GO:0016813 | hydrolase activity, acting on carbon-nitrogen (but not peptide) bonds, in linear amidines | 0.0091 |
| F | GO:0008158 | hedgehog receptor activity                                                                | 0.01   |
| F | GO:0004617 | phosphoglycerate dehydrogenase activity                                                   | 0.01   |
| F | GO:0035004 | phosphoinositide 3-kinase activity                                                        | 0.04   |
| F | GO:0004842 | ubiquitin-protein ligase activity                                                         | 0.012  |
| F | GO:0003964 | RNA-directed DNA polymerase activity                                                      | 0.014  |
| F | GO:0003796 | lysozyme activity                                                                         | 0.017  |
| F | GO:0020037 | heme binding                                                                              | 0.027  |
| F | GO:0003779 | actin binding                                                                             | 0.033  |
| F | GO:0019787 | small conjugating protein ligase activity                                                 | 0.022  |
| F | GO:0032549 | ribonucleoside binding                                                                    | 0.029  |
| F | GO:0016881 | acid-amino acid ligase activity                                                           | 0.025  |
| F | GO:0005540 | hyaluronic acid binding                                                                   | 0.016  |
| F | GO:0016303 | 1-phosphatidylinositol-3-kinase activity                                                  | 0.04   |
| F | GO:0004601 | peroxidase activity                                                                       | 0.047  |
| C | GO:0034702 | ion channel complex                                                                       | 0.029  |
| C | GO:0034703 | cation channel complex                                                                    | 0.012  |
| C | GO:0005581 | collagen                                                                                  | 0.014  |
| C | GO:0043232 | intracellular non-membrane-bounded organelle                                              | 0.01   |
| C | GO:0005577 | fibrinogen complex                                                                        | 0.0091 |
| C | GO:0005604 | basement membrane                                                                         | 0.024  |

\* Species list are Supplementary Table 8.

Abbreviations: C, Cellular component; F, Molecular function; P, Biological process

**Supplementary Table 11. Gene Ontology for contracted gene families in the icefish genome relative to the 13 species\*.**

| Category | GO acc     | Term                                                                                                                           | p-value  |
|----------|------------|--------------------------------------------------------------------------------------------------------------------------------|----------|
| P        | GO:0046835 | carbohydrate phosphorylation                                                                                                   | 1.90E-13 |
| P        | GO:0006003 | fructose 2,6-bisphosphate metabolic process                                                                                    | 1.30E-12 |
| P        | GO:0006000 | fructose metabolic process                                                                                                     | 6.70E-10 |
| P        | GO:0044237 | cellular metabolic process                                                                                                     | 4.60E-08 |
| P        | GO:0010467 | gene expression                                                                                                                | 1.30E-07 |
| P        | GO:0006004 | fucose metabolic process                                                                                                       | 4.00E-07 |
| P        | GO:0005996 | monosaccharide metabolic process                                                                                               | 5.20E-07 |
| P        | GO:0044260 | cellular macromolecule metabolic process                                                                                       | 5.20E-07 |
| P        | GO:0006066 | alcohol metabolic process                                                                                                      | 1.40E-06 |
| P        | GO:0019318 | hexose metabolic process                                                                                                       | 1.50E-06 |
| P        | GO:0044238 | primary metabolic process                                                                                                      | 3.90E-06 |
| P        | GO:0031145 | anaphase-promoting complex-dependent proteasomal ubiquitin-dependent protein catabolic process                                 | 4.20E-06 |
| P        | GO:0007200 | activation of phospholipase C activity by G-protein coupled receptor protein signaling pathway coupled to IP3 second messenger | 4.90E-06 |
| P        | GO:0007202 | activation of phospholipase C activity                                                                                         | 7.60E-06 |
| P        | GO:0010863 | positive regulation of phospholipase C activity                                                                                | 9.40E-06 |
| P        | GO:0007067 | mitosis                                                                                                                        | 9.00E-06 |
| P        | GO:0022613 | ribonucleoprotein complex biogenesis                                                                                           | 9.60E-06 |
| P        | GO:0000280 | nuclear division                                                                                                               | 1.10E-05 |
| P        | GO:0010518 | positive regulation of phospholipase activity                                                                                  | 1.40E-05 |
| P        | GO:0010517 | regulation of phospholipase activity                                                                                           | 1.40E-05 |
| P        | GO:0048285 | organelle fission                                                                                                              | 1.70E-05 |
| P        | GO:0030071 | regulation of mitotic metaphase/anaphase transition                                                                            | 2.10E-05 |
| P        | GO:0043170 | macromolecule metabolic process                                                                                                | 2.20E-05 |
| P        | GO:0007091 | mitotic metaphase/anaphase transition                                                                                          | 2.10E-05 |
| P        | GO:0060193 | positive regulation of lipase activity                                                                                         | 2.50E-05 |
| P        | GO:0007178 | transmembrane receptor protein serine/threonine kinase signaling pathway                                                       | 2.90E-05 |
| P        | GO:0060191 | regulation of lipase activity                                                                                                  | 3.00E-05 |
| P        | GO:0000087 | M phase of mitotic cell cycle                                                                                                  | 3.80E-05 |
| P        | GO:0008152 | metabolic process                                                                                                              | 3.90E-05 |
| P        | GO:0042254 | ribosome biogenesis                                                                                                            | 3.90E-05 |
| P        | GO:0016070 | RNA metabolic process                                                                                                          | 4.20E-05 |
| P        | GO:0090092 | regulation of transmembrane receptor protein serine/threonine kinase signaling pathway                                         | 4.30E-05 |
| P        | GO:0048015 | phosphoinositide-mediated signaling                                                                                            | 4.30E-05 |
| P        | GO:0006607 | NLS-bearing substrate import into nucleus                                                                                      | 7.90E-05 |
| P        | GO:0045333 | cellular respiration                                                                                                           | 9.30E-05 |
| P        | GO:0007176 | regulation of epidermal growth factor receptor activity                                                                        | 0.00011  |
| P        | GO:0007175 | negative regulation of epidermal growth factor receptor activity                                                               | 0.00011  |
| P        | GO:0018345 | protein palmitoylation                                                                                                         | 0.00011  |
| P        | GO:0010469 | regulation of receptor activity                                                                                                | 0.00011  |
| P        | GO:0009987 | cellular process                                                                                                               | 0.00011  |
| P        | GO:0006457 | protein folding                                                                                                                | 0.00012  |
| P        | GO:0006396 | RNA processing                                                                                                                 | 0.00012  |
| P        | GO:0006364 | rRNA processing                                                                                                                | 0.00014  |
| P        | GO:0055014 | atrial cardiac muscle cell development                                                                                         | 0.00014  |
| F        | GO:0003873 | 6-phosphofructo-2-kinase activity                                                                                              | 3.80E-13 |

|   |            |                                                                              |          |
|---|------------|------------------------------------------------------------------------------|----------|
| F | GO:0019200 | carbohydrate kinase activity                                                 | 8.80E-13 |
| F | GO:0008443 | phosphofructokinase activity                                                 | 3.00E-11 |
| F | GO:0003746 | translation elongation factor activity                                       | 1.40E-05 |
| F | GO:0031386 | protein tag                                                                  | 2.70E-05 |
| F | GO:0017124 | SH3 domain binding                                                           | 4.80E-05 |
| F | GO:0051219 | phosphoprotein binding                                                       | 0.00011  |
| F | GO:0001784 | phosphotyrosine binding                                                      | 0.00011  |
| F | GO:0045309 | protein phosphorylated amino acid binding                                    | 0.00011  |
| C | GO:0030684 | preribosome                                                                  | 2.20E-10 |
| C | GO:0030529 | ribonucleoprotein complex                                                    | 1.70E-09 |
| C | GO:0043231 | intracellular membrane-bounded organelle                                     | 1.60E-08 |
| C | GO:0043227 | membrane-bounded organelle                                                   | 1.80E-08 |
| C | GO:0044424 | intracellular part                                                           | 2.90E-08 |
| C | GO:0005634 | nucleus                                                                      | 3.70E-08 |
| C | GO:0005622 | intracellular                                                                | 3.40E-07 |
| C | GO:0043229 | intracellular organelle                                                      | 7.80E-07 |
| C | GO:0043226 | organelle                                                                    | 9.10E-07 |
| C | GO:0034457 | Mpp10 complex                                                                | 1.10E-06 |
| C | GO:0005737 | cytoplasm                                                                    | 2.60E-06 |
| C | GO:0030686 | 90S preribosome                                                              | 2.40E-06 |
| C | GO:0045121 | membrane raft                                                                | 6.70E-06 |
| C | GO:0030672 | synaptic vesicle membrane                                                    | 1.40E-05 |
| C | GO:0032040 | small-subunit processome                                                     | 2.00E-05 |
| C | GO:0030687 | preribosome, large subunit precursor                                         | 2.10E-05 |
| C | GO:0044428 | nuclear part                                                                 | 5.80E-05 |
| C | GO:0032991 | macromolecular complex                                                       | 6.10E-05 |
| C | GO:0044455 | mitochondrial membrane part                                                  | 6.70E-05 |
| C | GO:0030665 | clathrin coated vesicle membrane                                             | 9.80E-05 |
| C | GO:0016469 | proton-transporting two-sector ATPase complex                                | 0.0001   |
| C | GO:0005689 | U12-type spliceosomal complex                                                | 0.00013  |
| C | GO:0044452 | nucleolar part                                                               | 0.00018  |
| C | GO:0005680 | anaphase-promoting complex                                                   | 0.00018  |
| C | GO:0005687 | U4 snRNP                                                                     | 0.00022  |
| C | GO:0031410 | cytoplasmic vesicle                                                          | 0.00029  |
| C | GO:0031307 | integral to mitochondrial outer membrane                                     | 0.0003   |
| C | GO:0044444 | cytoplasmic part                                                             | 0.00028  |
| C | GO:0000152 | nuclear ubiquitin ligase complex                                             | 0.0003   |
| C | GO:0005686 | U2 snRNP                                                                     | 0.00041  |
| C | GO:0071564 | npBAF complex                                                                | 0.00041  |
| C | GO:0031982 | vesicle                                                                      | 0.00039  |
| C | GO:0016507 | fatty acid beta-oxidation multienzyme complex                                | 0.00041  |
| C | GO:0000243 | commitment complex                                                           | 0.00042  |
| C | GO:0030532 | small nuclear ribonucleoprotein complex                                      | 0.00055  |
| C | GO:0071011 | precatalytic spliceosome                                                     | 0.00058  |
| C | GO:0000276 | mitochondrial proton-transporting ATP synthase complex, coupling factor F(o) | 0.00072  |
| C | GO:0031306 | intrinsic to mitochondrial outer membrane                                    | 0.0007   |
| C | GO:0044446 | intracellular organelle part                                                 | 0.0009   |
| C | GO:0044422 | organelle part                                                               | 0.00087  |
| C | GO:0030688 | preribosome, small subunit precursor                                         | 0.00089  |

\* Species list are Supplementary Table 8.

Abbreviations: C, Cellular component; F, Molecular function; P, Biological process

**Supplementary Table 12. CAFE<sup>5</sup> gene family analysis results.**

| Species           | No. of coding genes | No. of Expanded families | No. of Contracted families. | No. of Genes lost |
|-------------------|---------------------|--------------------------|-----------------------------|-------------------|
| Icefish           | 30,773              | 1793 (280)               | 6831 (6)                    | 6869              |
| Dragonfish        | 32,713              | 1174 (162)               | 4057 (1)                    | 4080              |
| Bullhead notothen | 32,661              | 1178 (8)                 | 5534 (2)                    | 5640              |
| Stickleback       | 27,576              | 465 (59)                 | 10704 (2)                   | 10732             |
| Platyfish         | 20,779              | 184 (3)                  | 1928 (32)                   | 2002              |
| Amazon molly      | 24354               | 1195 (165)               | 780 (1)                     | 781               |
| Medaka            | 20459               | 452 (78)                 | 4953 (3)                    | 5018              |
| Tilapia           | 27088               | 800 (133)                | 4047 (0)                    | 4057              |
| Takifugu          | 18,523              | 390 (47)                 | 1924 (3)                    | 1935              |
| Tetraodon         | 23,118              | 530 (24)                 | 1895 (7)                    | 1927              |
| Cod               | 22,100              | 391 (21)                 | 14427 (3)                   | 14523             |
| Zebrafish         | 25,403              | 1183 (78)                | 2205 (0)                    | 2241              |
| Cavefish          | 23698               | 775 (8)                  | 2542 (16)                   | 2753              |

**Supplementary Table 13. CAFE<sup>5</sup> results for significantly expanded genes in icefish.**

| Category | GO acc     | Term                                                                                                                          | <i>p</i> -value |
|----------|------------|-------------------------------------------------------------------------------------------------------------------------------|-----------------|
| F        | GO:0005488 | binding                                                                                                                       | 2.94E-03        |
| F        | GO:0005200 | structural constituent of cytoskeleton                                                                                        | 5.48E-03        |
| F        | GO:0030246 | carbohydrate binding                                                                                                          | 5.98E-03        |
| F        | GO:0005506 | iron ion binding                                                                                                              | 1.07E-02        |
| F        | GO:0003924 | GTPase activity                                                                                                               | 2.12E-02        |
| F        | GO:0008199 | ferric iron binding                                                                                                           | 1.79E-02        |
| F        | GO:0016702 | oxidoreductase activity, acting on single donors with incorporation of molecular oxygen, incorporation of two atoms of oxygen | 3.04E-02        |
| F        | GO:0016701 | oxidoreductase activity, acting on single donors with incorporation of molecular oxygen                                       | 3.04E-02        |
| F        | GO:0004984 | olfactory receptor activity                                                                                                   | 4.29E-02        |
| P        | GO:0051258 | protein polymerization                                                                                                        | 1.42E-02        |
| P        | GO:0043623 | cellular protein complex assembly                                                                                             | 1.86E-02        |
| P        | GO:0007017 | microtubule-based process                                                                                                     | 2.30E-02        |
| P        | GO:0034622 | cellular macromolecular complex assembly                                                                                      | 3.31E-02        |
| P        | GO:0006461 | protein complex assembly                                                                                                      | 4.28E-02        |
| P        | GO:0070271 | protein complex biogenesis                                                                                                    | 4.34E-02        |
| P        | GO:0006826 | iron ion transport                                                                                                            | 2.04E-02        |
| P        | GO:0000041 | transition metal ion transport                                                                                                | 2.54E-02        |
| P        | GO:0006879 | cellular iron ion homeostasis                                                                                                 | 2.79E-02        |
| P        | GO:0046916 | cellular transition metal ion homeostasis                                                                                     | 2.79E-02        |
| P        | GO:0055072 | iron ion homeostasis                                                                                                          | 3.29E-02        |
| P        | GO:0055076 | transition metal ion homeostasis                                                                                              | 3.54E-02        |
| P        | GO:0050911 | detection of chemical stimulus involved in sensory perception of smell                                                        | 4.29E-02        |
| P        | GO:0050907 | detection of chemical stimulus involved in sensory perception                                                                 | 4.53E-02        |
| P        | GO:0050906 | detection of stimulus involved in sensory perception                                                                          | 4.53E-02        |
| P        | GO:0006875 | cellular metal ion homeostasis                                                                                                | 4.78E-02        |
| P        | GO:0009593 | detection of chemical stimulus                                                                                                | 4.78E-02        |
| C        | GO:0005874 | microtubule                                                                                                                   | 1.00E-02        |
| C        | GO:0015630 | microtubule cytoskeleton                                                                                                      | 2.79E-02        |

Abbreviations: C, Cellular component; F, Molecular function; P, Biological process

**Supplementary Table 14. Positively selected genes in the icefish genome.** (Likelihood ratio test:  $\alpha=0.05$ ).

| Gene ID   | Descriptions                                                  |
|-----------|---------------------------------------------------------------|
| Cac000489 | synaptosomal-associated protein 47                            |
| Cac000662 | septin-10-like isoform X2                                     |
| Cac001617 | ester hydrolase C11orf54 homolog                              |
| Cac001771 | T-complex protein 1 subunit alpha                             |
| Cac002279 | delta-type opioid receptor-like                               |
| Cac003235 | protein FAM3C                                                 |
| Cac003886 | tripeptidyl-peptidase 1                                       |
| Cac004140 | poly(ADP-ribose) glycohydrolase ARH3                          |
| Cac004885 | nuclear pore complex protein Nup205                           |
| Cac004994 | thioredoxin domain-containing protein 5                       |
| Cac005124 | integrin alpha-6                                              |
| Cac005514 | high-affinity choline transporter 1-like                      |
| Cac006594 | phosphatidylinositol 4-kinase type 2-alpha                    |
| Cac011177 | neutrophil cytosol factor 1                                   |
| Cac011177 | neutrophil cytosol factor 1                                   |
| Cac012351 | lengsin                                                       |
| Cac013420 | cerebral cavernous malformations 2 protein isoform X2         |
| Cac013753 | sonic hedgehog protein                                        |
| Cac016183 | translation initiation factor eIF-2B subunit beta             |
| Cac016183 | translation initiation factor eIF-2B subunit beta             |
| Cac019931 | pyruvate dehydrogenase phosphatase catalytic subunit 1        |
| Cac019931 | pyruvate dehydrogenase phosphatase catalytic subunit 1        |
| Cac020370 | zinc finger MYND domain-containing protein 10                 |
| Cac020655 | beta-1:4 N-acetylgalactosaminyl transferase 1                 |
| Cac020945 | mitotic checkpoint protein BUB3                               |
| Cac020991 | F-box only protein 11 isoform X4                              |
| Cac021124 | NADPH--cytochrome P450 reductase isoform X1                   |
| Cac021496 | PX domain-containing protein 1                                |
| Cac021612 | translocon-associated protein subunit alpha isoform X2        |
| Cac022143 | reticulon-4-interacting protein 1: mitochondrial isoform X1   |
| Cac023068 | UNC93-like protein MFSD11                                     |
| Cac023070 | mpv17-like protein                                            |
| Cac025005 | protein CYR61                                                 |
| Cac025225 | rod cGMP-specific 3',5'-cyclic phosphodiesterase subunit beta |
| Cac025247 | RNA 3'&apos;-terminal phosphate cyclase-like protein          |
| Cac026046 | AP-1 complex subunit gamma-1 isoform X2                       |
| Cac026882 | sorting nexin-12                                              |
| Cac027018 | merlin-like                                                   |
| Cac027509 | peripheral myelin protein 22-like                             |
| Cac027988 | transcription cofactor vestigial-like protein 2 isoform X1    |
| Cac028923 | glomulin-like                                                 |
| Cac029538 | FAST kinase domain-containing protein 1                       |
| Cac029831 | general transcription factor 3C polypeptide 4                 |

**Supplementary Table 15. Gene ontology for positively selected genes in the icefish genome.**

| Category | GO accessory | Term                                                                 | p-value  |
|----------|--------------|----------------------------------------------------------------------|----------|
| F        | GO:0035091   | phosphatidylinositol binding                                         | 7.25E-05 |
| F        | GO:0005543   | phospholipid binding                                                 | 2.48E-04 |
| F        | GO:0008289   | lipid binding                                                        | 2.05E-03 |
| F        | GO:0016651   | oxidoreductase activity, acting on NAD(P)H                           | 8.93E-04 |
| F        | GO:0003958   | NADPH-hemoprotein reductase activity                                 | 3.26E-03 |
| F        | GO:0016175   | superoxide-generating NADPH oxidase activity                         | 3.26E-03 |
| F        | GO:0050664   | oxidoreductase activity, acting on NAD(P)H, oxygen as acceptor       | 3.26E-03 |
| F        | GO:0016653   | oxidoreductase activity, acting on NAD(P)H, heme protein as acceptor | 6.50E-03 |
| F        | GO:0010181   | FMN binding                                                          | 1.30E-02 |
| F        | GO:0004722   | protein serine/threonine phosphatase activity                        | 3.21E-02 |
| F        | GO:0004114   | 3',5'-cyclic-nucleotide phosphodiesterase activity                   | 3.53E-02 |
| F        | GO:0004112   | cyclic-nucleotide phosphodiesterase activity                         | 3.53E-02 |
| P        | GO:0030908   | protein splicing                                                     | 6.50E-03 |
| P        | GO:0016539   | intein-mediated protein splicing                                     | 6.50E-03 |
| P        | GO:0016485   | protein processing                                                   | 3.53E-02 |
| P        | GO:0051604   | protein maturation                                                   | 3.53E-02 |
| C        | GO:0000151   | ubiquitin ligase complex                                             | 3.53E-02 |

Abbreviations: C, Cellular component; F, Molecular function; P, Biological process



**Supplementary Table 16. Comparison of zona pellucida (*zp*) gene family members in icefish and other Antarctic fish.**

|                          | ZPAX1 | ZPAX2 | ZPC1 | ZPC2 | ZPC3 | ZPC4 | ZPC5 | ZPB | ZPD | CGL | CGH | Total      |
|--------------------------|-------|-------|------|------|------|------|------|-----|-----|-----|-----|------------|
| <i>C. aceratus</i>       | 29    | 7     | 22   | 13   | 7    | 2    | 33   | 2   | 1   | 8   | 7   | <b>131</b> |
| * <i>N. coriiceps</i>    | 1     | 2     | 2    | 1    | 1    | 2    | 1    | 3   | 1   | 4   | 0   | <b>18</b>  |
| * <i>P. charcoti</i>     | 4     | 1     | 2    | 2    | 2    | 1    | 3    | 6   | 1   | 7   | 1   | <b>30</b>  |
| ** <i>D. mawsoni</i>     | 1     | 1     | 1    | 1    | 1    | 1    | 8    | 1   | 1   | 1   | 1   | <b>18</b>  |
| ** <i>C. hamatus</i>     | 1     | 4     | 4    | 2    | 0    | 2    | 4    | 1   | 1   | 0   | 0   | <b>19</b>  |
| ** <i>G. acuticeps</i>   | 3     | 1     | 3    | 2    | 2    | 2    | 4    | 2   | 1   | 0   | 0   | <b>20</b>  |
| ** <i>T. bernacchii</i>  | 1     | 1     | 2    | 1    | 1    | 1    | 2    | 1   | 1   | 0   | 0   | <b>11</b>  |
| ** <i>N. angustata</i>   | 0     | 0     | 1    | 0    | 0    | 0    | 1    | 0   | 0   | 0   | 0   | <b>2</b>   |
| ** <i>D. eleginoides</i> | 1     | 0     | 1    | 1    | 0    | 0    | 5    | 0   | 0   | 0   | 0   | <b>8</b>   |
| ** <i>L. nudifrons</i>   | 1     | 1     | 1    | 1    | 1    | 1    | 1    | 1   | 1   | 0   | 0   | <b>9</b>   |
| ** <i>E. maclovinus</i>  | 1     | 1     | 2    | 1    | 1    | 1    | 3    | 1   | 0   | 0   | 0   | <b>11</b>  |

\* The number of *zp* genes was annotated from our previous research<sup>6,7</sup>.

\*\* The number of *zp* genes of 8 species of Antarctic fish was derived from the Supplementary Table 1 in Cao et al., 2016<sup>8</sup>.

**Supplementary Table 17. Genomic distribution of icefish zona pellucida (*zp*) family genes.**

The total number of annotated *zp* genes on each contig is indicated. Of the 131 icefish *zp* genes, 109 are distributed on 20 different scaffolds that have more than two genes, and 22 scaffolds have a single *zp* gene.

| Contig       | ZPAX1     | ZPAX2    | ZPC1      | ZPC2      | ZPC3     | ZPC4     | ZPC5      | ZP3      | ZP4      | ZPB      | ZPD      | Total      |
|--------------|-----------|----------|-----------|-----------|----------|----------|-----------|----------|----------|----------|----------|------------|
| Ice_000281   |           |          |           |           | 2        |          | 18        |          |          |          |          | 20         |
| Ice_010079   |           |          | 7         | 3         |          |          |           |          |          |          |          | 10         |
| Ice_000114   |           |          |           |           | 5        |          | 5         |          |          |          |          | 10         |
| Ice_030120   | 7         | 3        |           |           |          |          |           |          |          |          |          | 10         |
| Ice_040384   | 3         | 1        |           |           |          |          | 4         |          |          |          |          | 8          |
| Ice_051004   |           |          | 4         | 4         |          |          |           |          |          |          |          | 8          |
| Ice_060311   | 1         | 1        | 4         |           |          |          |           |          |          |          |          | 6          |
| Ice_070981   |           |          | 5         |           |          |          |           |          |          |          |          | 5          |
| Ice_080050   |           |          |           |           |          |          |           | 1        | 3        |          |          | 4          |
| Ice_090470   |           |          | 2         | 2         |          |          |           |          |          |          |          | 4          |
| Ice_100683   |           |          |           |           |          |          | 4         |          |          |          |          | 4          |
| Ice_110055   |           |          |           |           |          |          |           | 3        |          |          |          | 3          |
| Ice_120371   | 3         |          |           |           |          |          |           |          |          |          | 1        | 4          |
| Ice_130009   |           |          |           |           |          | 1        |           |          |          | 1        |          | 2          |
| Ice_140019   |           |          |           |           |          | 1        |           |          |          | 1        |          | 2          |
| Ice_150293   | 2         |          |           |           |          |          |           |          |          |          |          | 2          |
| Ice_160991   | 2         |          |           |           |          |          |           |          |          |          |          | 2          |
| Ice_171379   | 1         | 1        |           |           |          |          |           |          |          |          |          | 2          |
| Ice_182290   | 2         |          |           |           |          |          |           |          |          |          |          | 2          |
| Ice_192443   | 2         |          |           |           |          |          |           |          |          |          |          | 2          |
| Ice_200015   |           |          |           |           |          |          |           |          | 1        |          |          | 1          |
| Ice_210036   |           |          |           |           |          |          |           |          | 1        |          |          | 1          |
| Ice_220080   |           |          |           |           |          |          |           | 1        |          |          |          | 1          |
| Ice_230090   | 1         |          |           |           |          |          |           |          |          |          |          | 1          |
| Ice_240126   |           |          |           |           |          |          |           |          | 1        |          |          | 1          |
| Ice_250182   |           |          |           | 1         |          |          |           |          |          |          |          | 1          |
| Ice_260204   |           |          |           |           |          |          | 1         |          |          |          |          | 1          |
| Ice_270271   |           | 1        |           |           |          |          |           |          |          |          |          | 1          |
| Ice_280276   |           |          |           | 1         |          |          |           |          |          |          |          | 1          |
| Ice_290336   |           |          |           |           |          |          |           | 1        |          |          |          | 1          |
| Ice_300443   | 1         |          |           |           |          |          |           |          |          |          |          | 1          |
| Ice_310473   |           |          |           |           |          |          |           | 1        |          |          |          | 1          |
| Ice_320486   |           |          |           |           |          |          |           | 1        |          |          |          | 1          |
| Ice_330519   | 1         |          |           |           |          |          |           |          |          |          |          | 1          |
| Ice_340709   |           |          |           |           |          |          | 1         |          |          |          |          | 1          |
| Ice_350845   |           |          |           |           |          |          |           |          | 1        |          |          | 1          |
| Ice_361246   | 1         |          |           |           |          |          |           |          |          |          |          | 1          |
| Ice_371821   |           |          |           | 1         |          |          |           |          |          |          |          | 1          |
| Ice_382268   | 1         |          |           |           |          |          |           |          |          |          |          | 1          |
| Ice_392717   |           |          |           | 1         |          |          |           |          |          |          |          | 1          |
| Ice_402947   | 1         |          |           |           |          |          |           |          |          |          |          | 1          |
| <b>Total</b> | <b>29</b> | <b>7</b> | <b>22</b> | <b>13</b> | <b>7</b> | <b>2</b> | <b>33</b> | <b>8</b> | <b>7</b> | <b>2</b> | <b>1</b> | <b>131</b> |

**Supplementary Table 18. Annotation of antioxidant defense system related genes in five teleosts.** Genes were selected from the gene set of antioxidant activity (M15021) of Gene Set Enrichment Analysis<sup>9</sup> (GSEA, <http://software.broadinstitute.org/gsea/index.jsp>).

|                                         | Icefish | Dragonfish | Antarctic<br>bullhead | Takifugu | Medaka | Platyfish | Zebrafish |
|-----------------------------------------|---------|------------|-----------------------|----------|--------|-----------|-----------|
| Superoxide dismutase                    | 5       | 3          | 3                     | 3        | 3      | 3         | 4         |
| Catalase                                | 1       | 1          | 1                     | 1        | 1      | 1         | 1         |
| NAD(P)H:quinone acceptor oxidoreductase | 33      | 2          | 2                     | 2        | 3      | 3         | 1         |
| Glutathione peroxidase                  | 4       | 7          | 4                     | 9        | 6      | 6         | 9         |
| Selenoprotein S                         | 1       | 1          | 1                     | 1        | 0      | 1         | 1         |
| Eosinophil peroxidase                   | 7       | 4          | 4                     | 3        | 6      | 4         | 2         |
| Microsomal glutathione S-transferase 3  | 2       | 2          | 2                     | 2        | 2      | 2         | 2         |
| Cytoglobin                              | 2       | 2          | 2                     | 2        | 2      | 2         | 2         |
| 8-oxoguanine DNA glycosylase            | 2       | 1          | 1                     | 1        | 1      | 1         | 1         |
| Thioredoxin reductase                   | 3       | 3          | 2                     | 2        | 2      | 3         | 2         |
| Peroxiredoxin                           | 6       | 6          | 6                     | 6        | 6      | 6         | 6         |
| Apolipoprotein A-IV                     | 4       | 2          | 3                     | 6        | 2      | 1         | 4         |
| Total                                   | 70      | 34         | 31                    | 38       | 34     | 33        | 35        |

**Supplementary Table 19. *sod* genes identified in teleost genomes.** The Genbank accession number is indicated for each *sod* gene.

|                    | SOD1               | SOD2               | SOD3                                                  |
|--------------------|--------------------|--------------------|-------------------------------------------------------|
| Icefish            | CacV3p_001772      | CacV3p_016306      | CacV3p_021817-1<br>CacV3p_021817-2<br>CacV3p_021817-3 |
| Antarctic Bullhead | XP_010771234.1     | XP_010770367.1     | XP_010775098.1                                        |
| Dragonfish         | DFtranscrip-31740  | DFtranscrip-29679  | DFtranscrip-21872                                     |
| Stickleback        | ENSGACG00000020581 | ENSGACG00000009000 | ENSGACG00000017840                                    |
| Takifugu           | XP_003971372       | XP_011610563       | XP_011610687                                          |
| Platyfish          | XP_005807113       | XP_005802672       | XP_005807205                                          |
| Amazon molly       | XP_007555641       | XP_007546844       | XP_007551838                                          |
| Medaka             | XP_004076261       | XP_004083519       | XP_004084336                                          |
| Zebrafish          | NP_571369.1        | NP_956270          | NP_001092706 (chr7)*<br>XP_001332758 (chr1)           |

\* Zebrafish has two *sod3* genes (*sod3a* and *sod3b*); *sod3a* is located on chromosome 7 with similar synteny to that of other teleosts, whereas *sod3b* is located on chromosome 1.

**Supplementary Table 20. Circadian rhythm-related genes identified in teleost genomes.** The location of each gene in each chromosome or scaffold is noted for each gene. Chromosomal location was based on the updated Supplementary Material 13 of Toloza-Villalobos et al. (2015)<sup>10</sup>. Updated information is marked with an asterisk (\*). A dash means that the gene was not found on a defined chromosome or scaffold.

|               | Icefish                                    | Stickleback                   | Takifugu                     | Medaka                   | Platyfish                  | Zebrafish                |
|---------------|--------------------------------------------|-------------------------------|------------------------------|--------------------------|----------------------------|--------------------------|
| <i>per1a</i>  | -                                          | -                             | -                            | -                        | -                          | Chr10:23010981-23028617  |
| <i>per1b</i>  | Cacp_005339<br>Ice_000086:2255858..2264187 | groupIII:1517985-1529008      | Scaffold_63:506313-512694    | Chr18:15189752-15199550  | JH556673.1:326107-343686*  | Chr7:52277645-52301471   |
| <i>per2a</i>  | -                                          | groupI:1855721-1863275*       | Scaffold_344:165475-173866   | Chr13:31788175-31800229  | JH556784.1:457717-480890   | -                        |
| <i>per2b</i>  | Cacp_024627<br>Ice_000019:2927559..2939828 | groupVII:3993749-4000926*     | Scaffold_123:243442-251642   | Chr17:25658720-25680938  | JH556667.1:3479242-3504286 | Chr2:48423772-48489514   |
| <i>per3</i>   | -                                          | -                             | Chr19:11805147-11815446*     | Chr5:29288111-29298254   | JH556773.1:1356945-1376982 | Chr11:41435220-41490992  |
| <i>cry1aa</i> | Cacp_026503<br>Ice_000025:3445991..3456768 | groupIV:32004462-32008670     | Scaffold_4395:1-440          | Chr23:19786254 -19805276 | JH556703.1:1996368-2009995 | Chr4:12011692-12027887*  |
| <i>cry1ab</i> | -                                          | groupXIX:17896031-17900731:1* | Scaffold_21:12588914-1264794 | Chr6:30902546-30911031   | Chr2:17084212-17094297*    | Chr18:15104200-15132014* |
| <i>cry1ba</i> | Cacp_006784<br>Ice_000125:1848029..1834983 | groupXII:13140358-13147524*   | Scaffold_278:81132-99203*    | Chr7:28299032 -28474995* | Chr1:29806902 -29840394*   | Chr8:21222300-21255421*  |
| <i>cry1bb</i> | -                                          | -                             | -                            | -                        | -                          | Chr22:783514-811211*     |
| <i>cry2</i>   | -                                          | groupXIX:1002682-1016637      | Scaffold_591:4558-10348*     | Chr6:22492682-22503706   | Chr2: 4478878-4495387*     | Chr25:13845092-13873484  |
| <i>clocka</i> | Cacp_021314<br>Ice_000042:1091634..1109722 | -                             | Scaffold_13:1587298-1594020  | -                        | JH557215.1:159758-185684   | Chr20:22202472-22246469  |

|                 |                                           |                                |                                 |                               |                                |                             |
|-----------------|-------------------------------------------|--------------------------------|---------------------------------|-------------------------------|--------------------------------|-----------------------------|
| <i>clockb</i>   | Cacp_021654<br>Ice_000015:997555..1012718 | groupIX:489361-<br>499374      | Scaffold_563:28933-<br>37732    | Chr1:14996520-<br>15007939    | JH556907.1:802434-<br>820177   | Chr1:18174899-<br>18208348  |
| <i>npas2a</i>   | Cacp_011192<br>Ice_000386:348502..366485  | groupVII:17209951-<br>17217908 | Scaffold_6:1321121-<br>1331856  | Chr14:17135493-<br>17147943   | -                              | Chr5:24572014-<br>24614052  |
| <i>arntl1a</i>  | Cacp_017407<br>Ice_000301:749264..791055  | groupXIX:1196030-<br>1206038   | Scaffold_30:314818-<br>322668   | Scaffold212:822889-<br>852119 | JH556669.1:1164407-<br>1191899 | Chr25:18381074-<br>18406100 |
| <i>arntl1b</i>  | -                                         | -                              | -                               | -                             | -                              | Chr7:67945182-<br>68002908  |
| <i>arntl2a</i>  | Cacp_009803<br>Ice_000337:138232..147037  | -                              | Scaffold_105:333609-<br>341010  | Chr6:16473669-<br>16484384    | JH556735.1:1789641-<br>1801148 | Chr18:15249987-<br>15289314 |
| <i>arntl2b</i>  | Cacp_026454<br>Ice_000025:673361..679455  | groupIV:22530990-<br>22537106  | Scaffold_657:8465-<br>12073     | Chr23:2931241-<br>2954154     | JH556873.1:690137-<br>707607   | -                           |
| <i>csnk1ea</i>  | Cacp_012338<br>Ice_001973:12374..33989    | groupV:5628628-<br>5633878     | Scaffold_3:2837555-<br>2840657  | Chr19:803568-<br>811280       | JH559539.1:29-8132             | Chr12:20401738-<br>20414656 |
| <i>csnk1eb</i>  | Cacp_029385<br>Ice_000244:45..10972       | groupXI:4260952-<br>4268829    | Scaffold_253:334382-<br>342511  | Chr8:19677134-<br>19684994    | JH556752.1:1560221-<br>1567996 | -                           |
| <i>csnk1da</i>  | Cacp_014005<br>Ice_000322F:247084..274355 | Scaffold54:477509-<br>486247   | Scaffold_41:895893-<br>902348   | Chr8:25232642-<br>25239805    | JH557172.1:17306-<br>26673     | -                           |
| <i>csnk1db</i>  | Cacp_006446<br>Ice_000123F:682442..704673 | groupXI:1303431-<br>1312998    | -                               | -                             | -                              | Chr12:34815412-<br>34831695 |
| <i>csnk1dc</i>  | -                                         | -                              | -                               | -                             | -                              | Chr3:36172321-<br>36209462  |
| <i>timeless</i> | Cacp_000716<br>Ice_000119F:944982..953940 | Scaffold27:1143834-<br>1158386 | Scaffold_47:1354118-<br>1362657 | Chr5:27745117-<br>27758015    | JH556773.1: 50419-<br>64006    | Chr11:3195071-<br>3229802   |

**Supplementary Table 21. The number of olfactory receptor genes in 6 teleost species.**

|              | Icefish    | Medaka    | Stickleback | Takifugu   | Tetraodon | Zebrafish  |
|--------------|------------|-----------|-------------|------------|-----------|------------|
| alpha        | 0          | 0         | 0           | 0          | 0         | 0          |
| beta         | 1          | 3         | 1           | 1          | 0         | 7          |
| gamma        | 2          | 1         | 3           | 0          | 0         | 1          |
| delta        | 161        | 44        | 112         | 55         | 14        | 69         |
| epsilon      | 2          | 4         | 4           | 3          | 2         | 13         |
| zeta         | 10         | 12        | 23          | 10         | 2         | 41         |
| eta          | 35         | 30        | 12          | 31         | 12        | 45         |
| theta        | 0          | 1         | 1           | 1          | 1         | 1          |
| theta-2      | 0          | 0         | 0           | 0          | 0         | 1          |
| kappa        | 1          | 1         | 3           | 1          | 1         | 2          |
| lambda       | 0          | 1         | 1           | 0          | 0         | 1          |
| <b>Total</b> | <b>212</b> | <b>97</b> | <b>160</b>  | <b>102</b> | <b>32</b> | <b>181</b> |

## References

1. Chalopin, D., Naville, M., Plard, F., Galiana, D. & Volff, J.-N. Comparative analysis of transposable elements highlights mobilome diversity and evolution in vertebrates. *Genome Biol. Evol.* **7**, 567-580 (2015).
2. Niimura, Y. On the origin and evolution of vertebrate olfactory receptor genes: comparative genome analysis among 23 chordate species. *Genome Biol. Evol.* **1**, 34-44 (2009).
3. Park, H., Lee, S. H., Kim, M., Kim, K. H. & Lim, H. S. Polychlorinated biphenyl congeners in soils and lichens from King George Island, South Shetland Islands, Antarctica. *Ant. Sci.* **22**, 31-38 (2010)
4. Opazo, J. C., Butts, G. T., Nery, M. F., Storz, J. F. & Hoffmann, F. G. Whole-genome duplication and the functional diversification of teleost fish hemoglobins. *Mol. Biol. Evol.* **30**, 140-153 (2013).
5. Han, M. V., Thomas, G. W., Lugo-Martinez, J. & Hahn, M. W. Estimating gene gain and loss rates in the presence of error in genome assembly and annotation using CAFE 3. *Mol. Biol. Evol.* **30**, 1987-1997 (2013).
6. Shin, S. C. *et al.* The genome sequence of the Antarctic bullhead notothen reveals evolutionary adaptations to a cold environment. *Genome Biol.* **15**, 468 (2014).
7. Ahn, D.-H. *et al.* Draft genome of the Antarctic dragonfish, *Parachaenichthys charcoti*. *GigaScience* **6**, 1-6 (2017).
8. Cao, L. *et al.* Neofunctionalization of zona pellucida proteins enhances freeze-prevention in the eggs of Antarctic notothenioids. *Nat. Commun.* **7**, 12987 (2016).
9. Subramanian, A. *et al.* Gene set enrichment analysis: A knowledge-based approach for interpreting genome-wide expression profiles. *Proc. Natl. Acad. Sci. U.S.A.* **102**, 15545-15550 (2005).
10. Toloza-Villalobos, J., Arroyo, J. I. & Opazo, J. C. The Circadian Clock of Teleost Fish: A Comparative Analysis Reveals Distinct Fates for Duplicated Genes. *J. Mol. Evol.* **80**, 57-64 (2015).
